# Supplementary material for: Salvianolic acid B plays an anti-obesity role in high fat diet-induced obese mice by regulating the expression of mRNA, circRNA, and lncRNA
Source: PeerJ. 2019 Feb 28;7:e6506. doi: 10.7717/peerj.6506 (PMC6397762; doi:10.7717/peerj.6506)
Supplement: Supplemental Information 1 [file peerj-07-6506-s001.xlsx]

## Sheet: up_EP-S_vs_EP-M
#log2FC >= 0.585 #p-value cut-off <= 0.05 #q-value cut-off <= 1.00 #Gene biotype: processed_transcript,lincRNA,3prime_overlapping_ncrna,antisense,non_coding,sense_intronic,sense_overlapping,TEC,known_ncrna,macro_lncRNA,bidirectional_promoter_lncrna,protein_coding #Condition pair: up_EP-S_vs_EP-M Column A: Track_id, The database name in gene level. Column B: Gene_Name, The name of gene. Column C: …
Annotation					DE Statistic				FPKM
Track_id	Gene_Name	Locus	Strand	Gene_Type	log2FC	Fold_Change	p_value	q_value	EP-S_FPKM	EP-M_FPKM	EP-M11	EP-M12	EP-M13	EP-M7	EP-M9	EP-S20	EP-S6	EP-S7	EP-S8	EP-S9
ENSMUSG00000040557.14	Wbscr27	chr5:134932368-134942637	+	protein_coding	1.03791	2.05325	0.00843949	0.353294	2.8357	1.79779	2.83618	3.40766	2.93694	2.50767	1.17598	6.73241	5.69517	9.48764	2.91753	7.71725
ENSMUSG00000018822.7	Sfrp5	chr19:42197971-42202252	-	protein_coding	0.93151	1.90727	0.0432083	0.461616	7.6643	6.73279	77.158	64.7162	179.94	103.298	139.411	229.861	275.728	94.6596	206.823	269.456
ENSMUSG00000097148.2	Gm3839	chr14:11280735-11356726	-	protein_coding	0.893155	1.85723	0.00397863	0.342496	1.0832	0.190044	0.932169	0	0	0	0	1.40516	0.924677	0.604244	1.39891	1.39658
ENSMUSG00000044405.4	Adig	chr2:158502612-158508198	+	protein_coding	0.783998	1.7219	0.000146462	0.218384	4.76236	3.97836	15.195	11.2411	16.8011	15.942	15.2713	26.2131	31.4249	23.6953	24.8794	25.1121
ENSMUSG00000101089.1	2610016A17Rik	chr19:25671134-25672253	-	lincRNA	0.782	1.71951	0.0063142	0.350571	2.77095	1.98895	2.16314	1.95322	3.53458	3.55592	4.10663	4.72976	7.51657	4.08489	6.79764	6.65674
ENSMUSG00000001288.14	Rarg	chr15:102234938-102257517	-	protein_coding	0.718213	1.64514	0.00901826	0.353294	3.00525	2.28703	3.8904	5.88685	3.56507	3.11359	3.37819	7.595	4.2867	9.25835	6.79069	8.18887
ENSMUSG00000030664.3	Sox6os	chr7:116031979-116032550	+	antisense	0.703447	1.62839	0.00242919	0.33381	2.14659	1.44314	1.91994	1.28513	1.46259	2.06738	1.9492	3.80763	4.19522	2.21121	2.95953	4.35913
ENSMUSG00000026688.5	Mgst3	chr1:167371966-167393841	-	protein_coding	0.695882	1.61987	0.00621615	0.349512	5.57139	4.87551	25.3446	21.1277	38.203	27.2658	32.741	49.3037	59.1732	36.2165	40.295	51.2562
ENSMUSG00000031808.6	Slc27a1	chr8:71568927-71586708	+	protein_coding	0.687895	1.61093	0.00397045	0.342496	6.86606	6.17816	64.3665	60.0788	91.4932	75.7425	69.2539	138.58	139.63	103.376	84.2727	122.633
ENSMUSG00000024277.14	Mapre2	chr18:23752333-23893861	+	protein_coding	0.684097	1.6067	0.0152956	0.383643	3.12267	2.43858	4.85667	3.62172	3.86275	4.80148	5.13123	10.5775	9.23245	6.36097	9.71852	4.36326
ENSMUSG00000029195.10	Klb	chr5:65348314-65384007	+	protein_coding	0.683384	1.6059	0.0180276	0.390361	3.16764	2.48425	4.92116	2.73259	5.5344	6.32412	4.18554	9.96007	9.282	4.8956	8.08561	8.70499
ENSMUSG00000041736.7	Tspo	chr15:83563592-83574203	+	protein_coding	0.678597	1.60058	0.0168647	0.390361	4.90575	4.22715	13.6811	12.1211	22.7877	20.0743	22.8594	23.4833	34.4883	37.1022	23.1711	29.2471
ENSMUSG00000027221.5	Chst1	chr2:92599707-92615250	+	protein_coding	0.674019	1.59551	0.034648	0.441017	5.22412	4.5501	19.9648	15.702	30.6351	26.4873	22.1753	45.5235	46.4977	20.1913	38.5479	38.3967
ENSMUSG00000029772.17	Ahcyl2	chr6:29768011-29912310	+	protein_coding	0.673176	1.59458	0.00459791	0.342496	3.11962	2.44644	5.45162	2.96736	4.08313	6.45068	3.96318	7.82144	9.17093	6.50398	7.60621	7.56023
ENSMUSG00000032051.8	Fdx1	chr9:51943307-51963533	-	protein_coding	0.660972	1.58115	0.0258695	0.413055	4.1424	3.48143	7.13455	10.8171	13.8001	10.162	9.94508	13.5233	22.5417	18.5879	10.4135	21.4708
ENSMUSG00000035828.10	Pim3	chr15:88862186-88865718	+	protein_coding	0.656747	1.57652	0.0185508	0.391483	4.25219	3.59544	9.77951	7.89743	17.3448	9.19923	13.379	15.1663	22.5162	20.7316	14.3255	18.847
ENSMUSG00000018566.14	Slc2a4	chr11:69942539-69948188	-	protein_coding	0.636846	1.55493	0.0212111	0.399172	3.8916	3.25475	7.2818	5.65506	10.3976	9.92302	10.5468	14.8855	19.6585	9.60364	14.5433	12.315
ENSMUSG00000024939.6	Fam89b	chr19:5728087-5729653	-	protein_coding	0.633206	1.55101	0.0299695	0.426626	2.89792	2.26471	3.75819	3.74507	4.40388	3.32633	3.85537	3.45664	6.12567	8.8701	5.5398	10.2224
ENSMUSG00000046215.3	Rprml	chr11:103649570-103650579	+	protein_coding	0.63297	1.55075	0.0484836	0.476875	2.15643	1.52346	1.88447	2.41053	1.2383	1.42388	2.6789	3.04464	5.75201	5.11929	1.78679	2.78122
ENSMUSG00000097971.3	Gm26917	chr17:39843013-39846341	+	lincRNA	0.631025	1.54867	0.00972482	0.354099	10.6637	10.0327	813.26	1007.95	1224.66	971.196	1286.95	1377	1520.84	2306.79	1332.56	1739.25
ENSMUSG00000029482.4	Aacs	chr5:125475814-125517410	+	protein_coding	0.629708	1.54725	0.000528505	0.285138	4.00239	3.37268	7.98167	10.2537	10.5026	9.78561	8.50818	14.5022	16.1447	18.4634	12.5248	14.1119
ENSMUSG00000106674.1	Gm43153	chr5:149641610-149647790	+	lincRNA	0.614091	1.53059	0.000139772	0.218384	0.614091	0	0	0	0	0	0	0.417553	0.616256	0.443484	0.33432	0.903608
ENSMUSG00000001918.17	Slc1a5	chr7:16781340-16798274	+	protein_coding	0.609074	1.52528	0.015987	0.387111	6.89623	6.28716	75.7301	51.2852	90.9826	76.1234	101.065	113.814	158.865	101.068	105.221	119.507
ENSMUSG00000092564.1	BC051226	chr17:33908182-33909317	-	antisense	0.605363	1.52136	0.00592807	0.344655	3.05746	2.45209	3.31369	4.34877	5.25037	4.77488	4.8914	8.90238	7.90875	5.32462	6.10458	9.08796

## Sheet: down_EP-S_vs_EP-M
#log2FC <= -0.585 #p-value cut-off <= 0.05 #q-value cut-off <= 1.00 #Gene biotype: processed_transcript,lincRNA,3prime_overlapping_ncrna,antisense,non_coding,sense_intronic,sense_overlapping,TEC,known_ncrna,macro_lncRNA,bidirectional_promoter_lncrna,protein_coding #Condition pair: down_EP-S_vs_EP-M Column A: Track_id, The database name in gene level. Column B: Gene_Name, The name of gene. Column …
Annotation					DE Statistic				FPKM
Track_id	Gene_Name	Locus	Strand	Gene_Type	log2FC	Fold_Change	p_value	q_value	EP-S_FPKM	EP-M_FPKM	EP-M11	EP-M12	EP-M13	EP-M7	EP-M9	EP-S20	EP-S6	EP-S7	EP-S8	EP-S9
ENSMUSG00000098470.1	C1rb	chr6:124570294-124581171	+	protein_coding	-1.65153	0.318302	0.0208088	0.398094	1.20044	2.85198	10.1589	3.03845	9.67029	3.8292	7.44823	0	2.76036	0	3.05091	3.20793
ENSMUSG00000092009.1	Myh15	chr16:49057486-49199104	+	protein_coding	-1.34134	0.394653	0.00940593	0.353862	1.79516	3.1365	12.0315	7.64569	7.60059	4.63763	8.62696	4.17878	1.26239	0.709661	3.51478	4.56724
ENSMUSG00000031849.8	Comp	chr8:70373548-70382065	+	protein_coding	-1.30156	0.405686	0.00220262	0.33381	1.2634	2.56496	8.04354	3.50877	5.84756	4.05693	4.13847	2.60839	0.460506	1.5329	0.967818	2.03517
ENSMUSG00000056071.12	S100a9	chr3:90692632-90695721	-	protein_coding	-1.26303	0.416668	0.0025342	0.336046	0.0882995	1.35133	1.07627	0.33434	2.9682	2.6043	1.7289	0	0.0843793	0	0.252341	0
ENSMUSG00000056054.9	S100a8	chr3:90668978-90670035	+	protein_coding	-1.09895	0.466856	0.0209547	0.398094	2.64489	3.74384	14.7097	7.62869	12.0782	24.6477	8.4915	9.45599	3.19934	3.10238	5.92672	6.67096
ENSMUSG00000020120.15	Plek	chr11:16971206-17052381	-	protein_coding	-1.02088	0.492816	0.00260373	0.342496	3.5527	4.57358	24.4114	17.7212	21.1288	30.2366	22.2779	14.5761	12.2823	6.72825	14.209	8.15031
ENSMUSG00000042111.9	Ccdc115	chr1:34436670-34439672	-	protein_coding	-0.998474	0.500529	0.011353	0.366978	2.43633	3.43481	10.3225	10.464	9.11238	9.20529	10.0392	2.54626	3.3769	6.95842	2.7606	9.00049
ENSMUSG00000097111.1	Peak1os	chr9:56257890-56267780	+	antisense	-0.987436	0.504373	0.00195463	0.33381	0.840294	1.82773	3.35665	2.75627	1.80355	3.25718	1.88582	1.33124	0.610857	0.192242	0.926313	1.1332
ENSMUSG00000040026.8	Saa3	chr7:46711998-46715700	-	protein_coding	-0.985949	0.504893	0.0137623	0.379286	2.53598	3.52193	11.6102	7.01244	11.4889	13.0784	10.2581	8.62069	3.07127	2.40547	5.31831	6.78597
ENSMUSG00000021886.6	Gpr65	chr12:98268635-98276624	+	protein_coding	-0.980719	0.506727	0.00798455	0.353294	2.95799	3.93871	16.3739	9.7963	11.3453	21.0651	15.5949	7.99839	7.23317	3.41289	7.50328	9.19012
ENSMUSG00000108715.1	Ltbp4	chr7:27311715-27333604	-	protein_coding	-0.955258	0.515749	0.0420074	0.461616	0.307988	1.26325	1.23953	2.69334	0	2.00122	2.20998	0	0	0.42035	0	1.04726
ENSMUSG00000074802.10	Gas2l3	chr10:89408823-89443967	-	protein_coding	-0.942062	0.520489	0.0327516	0.435182	2.25585	3.19791	10.8683	5.69872	7.47989	8.07557	9.63384	7.07689	4.45174	2.04935	1.51814	6.35064
ENSMUSG00000061068.6	Mcpt4	chr14:56059744-56062310	-	protein_coding	-0.930912	0.524527	0.0179447	0.390361	3.65389	4.5848	26.6504	22.4051	21.8803	24.5599	20.0273	15.3184	7.98731	5.68253	20.5668	13.9493
ENSMUSG00000053063.11	Clec12a	chr6:129342691-129365303	+	protein_coding	-0.920687	0.528257	0.0230394	0.407581	3.24353	4.16422	20.7941	13.5059	12.6659	20.9764	18.5119	12.1904	6.6012	3.69908	10.9773	12.505
ENSMUSG00000024672.11	Ms4a7	chr19:11321039-11336146	-	protein_coding	-0.908455	0.532755	0.0125635	0.377096	2.9419	3.85036	15.2409	10.5321	11.4438	16.1115	14.6533	9.98183	4.92848	3.37456	7.56789	9.9794
ENSMUSG00000024397.14	Aif1	chr17:35170991-35176068	-	protein_coding	-0.906804	0.533366	0.0104455	0.359283	2.07562	2.98242	8.17251	5.72121	4.45142	12.169	5.96612	4.31252	2.30557	2.12697	3.80049	4.04844
ENSMUSG00000021423.5	Ly86	chr13:37345345-37419036	+	protein_coding	-0.900115	0.535844	0.00792079	0.353294	4.35671	5.25682	45.9253	30.3778	27.6144	46.4318	39.8904	26.3197	16.4642	11.5808	22.4648	24.6299
ENSMUSG00000089929.1	Bcl2a1b	chr9:89199209-89207827	+	protein_coding	-0.892898	0.538531	0.0254073	0.413055	4.0717	4.9646	34.5493	21.8665	28.7645	39.8244	29.0484	23.8581	11.865	7.73989	18.1688	24.0927
ENSMUSG00000029919.5	Hpgds	chr6:65117293-65144908	-	protein_coding	-0.886906	0.540773	0.0232433	0.407581	3.4303	4.3172	25.4291	15.546	17.8068	16.9857	20.2821	13.5491	8.70917	4.06944	12.4972	14.0622
ENSMUSG00000028459.11	Cd72	chr4:43446462-43454628	-	protein_coding	-0.877883	0.544165	0.00435434	0.342496	1.57324	2.45112	4.32563	3.41338	3.156	6.33483	5.82492	2.82425	1.88081	1.19073	1.61302	2.6997
ENSMUSG00000031673.6	Cdh11	chr8:102632095-102785642	-	protein_coding	-0.874658	0.545383	0.00429127	0.342496	1.48377	2.35843	5.45698	3.30548	3.73817	2.62781	6.42139	1.4945	1.79323	1.67226	1.42719	2.78641
ENSMUSG00000099398.1	Ms4a14	chr19:11301249-11314454	-	protein_coding	-0.866179	0.548598	0.0102811	0.359283	2.70071	3.56689	14.9839	9.06951	8.0341	11.6064	11.7506	7.31397	4.7697	2.8026	6.71013	7.25784
ENSMUSG00000102037.1	Bcl2a1a	chr9:88956900-88962419	+	protein_coding	-0.862327	0.550065	0.019651	0.396344	1.51284	2.37517	4.45561	2.54906	3.03447	8.40585	4.11501	2.72523	1.49813	0.956544	2.56224	1.91792
ENSMUSG00000069607.4	Cd300ld3	chr11:115042131-115048409	-	protein_coding	-0.853553	0.55342	0.0327194	0.435182	4.66033	5.51388	56.8267	32.352	41.163	48.4521	48.528	33.1362	22.4719	10.4749	32.101	32.9733
ENSMUSG00000020077.14	Srgn	chr10:62493833-62527451	-	protein_coding	-0.842334	0.557741	0.00389531	0.342496	4.70292	5.54525	47.0789	46.1436	40.38	55.8669	40.63	25.6227	15.2673	23.5293	33.5128	31.6861
ENSMUSG00000015396.3	Cd83	chr13:43785107-43803130	+	protein_coding	-0.84169	0.55799	0.00198888	0.33381	3.14539	3.98708	15.2385	11.6019	14.0615	18.5246	15.6616	10.6441	7.81331	5.07888	7.6331	9.07035
ENSMUSG00000059089.4	Fcgr4	chr1:171018920-171029761	+	protein_coding	-0.824429	0.564706	0.0460319	0.468774	2.42818	3.25261	9.49207	4.4433	6.24498	18.8345	8.58258	5.85248	4.28913	2.61317	4.56842	5.1933
ENSMUSG00000024912.5	Fosl1	chr19:5447703-5455945	+	protein_coding	-0.824115	0.564828	0.0120364	0.372603	1.01085	1.83497	1.39129	4.41845	2.89944	2.06897	2.72737	1.53972	1.32953	0.315255	1.0766	1.05622
ENSMUSG00000032076.18	Cadm1	chr9:47530173-47857637	+	protein_coding	-0.821656	0.565792	0.00298582	0.342496	2.32326	3.14491	7.71145	9.04545	5.97601	9.8222	7.19561	4.67136	4.05733	2.32317	4.10838	5.4477
ENSMUSG00000028967.10	Errfi1	chr4:150853919-150868892	+	protein_coding	-0.821455	0.565871	0.00608065	0.347418	4.47471	5.29616	32.3825	32.2825	48.4701	40.8689	39.6962	15.4764	33.7616	25.0915	18.1308	18.0071
ENSMUSG00000038370.6	Pcp4l1	chr1:171173262-171196268	-	protein_coding	-0.814939	0.568432	0.0497061	0.479941	2.50382	3.31876	11.6805	12.353	7.88209	3.89858	12.4255	7.07426	2.47324	4.30283	4.31945	6.4201
ENSMUSG00000048621.3	Gm6377	chrX:109196756-109200439	+	protein_coding	-0.8128	0.569276	0.00174398	0.33381	0.872339	1.68514	2.50457	1.56904	1.704	3.31141	2.2761	1.05111	1.2871	0.438343	0.745315	0.745785
ENSMUSG00000049191.12	Rgag4	chrX:102066544-102071304	-	protein_coding	-0.811341	0.569852	0.0369948	0.448404	1.06361	1.87495	2.1139	5.14763	1.87468	2.51835	2.42881	1.93306	0.330148	1.65309	0.359681	1.83455
ENSMUSG00000040522.5	Tlr8	chrX:167242696-167264329	-	protein_coding	-0.811179	0.569916	0.0479784	0.474946	3.98012	4.7913	29.2856	18.6935	26.3929	31.9972	29.1965	21.4368	15.6816	5.58756	18.5132	19.3438
ENSMUSG00000078502.10	Gm13212	chr4:145585166-145625345	+	protein_coding	-0.803004	0.573154	0.0191422	0.394326	2.62286	3.42587	11.8175	6.62947	8.55943	12.762	10.1439	7.46786	5.03827	2.40269	5.90893	6.37711
ENSMUSG00000036446.4	Lum	chr10:97565501-97572703	+	protein_coding	-0.8	0.574349	0.018663	0.391746	5.42473	6.22473	90.174	56.79	68.1056	75.75	82.7227	59.9766	32.9385	23.6275	53.0391	52.0951
ENSMUSG00000035352.3	Ccl12	chr11:82101845-82103400	+	protein_coding	-0.798978	0.574756	0.0472961	0.473678	1.28812	2.0871	4.47228	3.32532	2.3231	6.83334	1.24763	1.40596	0.675702	1.62578	1.61899	2.13286
ENSMUSG00000056888.11	Glipr1	chr10:111985448-112002631	-	protein_coding	-0.795349	0.576204	0.0240673	0.410021	3.19097	3.98632	16.1314	11.9132	12.766	15.7331	18.6245	11.0504	7.61898	3.66292	8.98312	12.1374
ENSMUSG00000089722.2	Cd300ld5	chr11:115031486-115037769	-	protein_coding	-0.793935	0.576769	0.0336181	0.439127	4.3217	5.11563	42.3847	24.9645	30.9982	35.6492	36.922	26.4441	17.4447	8.58498	24.5447	24.7985
ENSMUSG00000018920.11	Cxcl16	chr11:70453983-70459984	-	protein_coding	-0.789515	0.578539	0.00756104	0.353294	2.60987	3.39938	11.5164	7.05833	8.45805	13.0406	8.76491	7.14691	4.28399	4.44787	3.54075	6.96034
ENSMUSG00000070873.5	Lilra5	chr7:4237754-4243463	+	protein_coding	-0.788668	0.578878	0.000366871	0.283457	0.69178	1.48045	2.14422	1.24957	1.63339	2.56283	1.54901	0.865284	0.428779	0.659444	0.518404	0.637465
ENSMUSG00000074505.4	Fat3	chr9:15910205-16378231	-	protein_coding	-0.787704	0.579265	0.00222493	0.33381	1.42135	2.20905	4.82147	3.37662	3.28134	2.77285	4.13496	2.03124	1.32941	0.954718	2.06059	2.2628
ENSMUSG00000021624.9	Cd180	chr13:102693558-102739629	+	protein_coding	-0.783714	0.580869	0.0333473	0.438178	3.38477	4.16848	20.5184	11.4174	14.6037	20.5399	19.9355	11.9494	8.13325	4.46276	12.1345	13.6516
ENSMUSG00000033581.16	Igf2bp2	chr16:22059009-22163299	-	protein_coding	-0.77457	0.584563	0.0195001	0.395676	1.90564	2.68021	5.94765	3.82455	6.49335	5.19053	5.95701	3.42185	2.24106	1.08382	4.27586	3.68634
ENSMUSG00000031264.13	Btk	chrX:134542336-134583570	-	protein_coding	-0.771046	0.585993	0.044245	0.463453	2.48955	3.26059	9.36883	5.22059	8.21137	12.162	9.33898	7.44386	5.13275	2.65372	2.59165	7.22089
ENSMUSG00000055541.17	Lair1	chr7:4003402-4063204	-	protein_coding	-0.770453	0.586233	0.0433878	0.461616	2.05734	2.82779	8.5043	3.63348	4.42013	8.36252	7.07281	2.68351	3.13326	1.38614	4.93239	4.79598
ENSMUSG00000026536.9	Mnda	chr1:173896345-173913046	-	protein_coding	-0.758937	0.590931	0.0372246	0.448443	4.3485	5.10744	42.1026	24.323	30.116	40.1229	33.8636	21.7965	27.7226	8.81117	22.4679	22.2733
ENSMUSG00000062345.10	Serpinb2	chr1:107511423-107535478	+	protein_coding	-0.753331	0.593232	0.0157176	0.385402	0.175045	0.928376	0.802096	1.59051	1.9342	0.379454	0.32125	0	0.119172	0.11101	0.060915	0.39051
ENSMUSG00000015340.10	Cybb	chrX:9435252-9487771	-	protein_coding	-0.751941	0.593804	0.0476279	0.473678	4.37384	5.12578	39.5792	22.2892	28.2253	46.9219	38.2032	25.0001	19.7594	9.242	25.0909	25.5597
ENSMUSG00000034390.15	Cmip	chr8:117257019-117461503	+	protein_coding	-0.74117	0.598254	0.00560064	0.342496	4.35986	5.10103	20.0762	30.9993	41.2567	38.0573	41.7847	20.1608	17.2092	18.9314	20.6049	20.9954
ENSMUSG00000032220.9	Myo1e	chr9:70207350-70400067	+	protein_coding	-0.739625	0.598895	0.0053707	0.342496	4.81119	5.55082	52.1277	40.7829	46.0037	42.1778	49.2462	35.0253	20.658	19.5963	27.1112	37.6079
ENSMUSG00000030147.12	Clec4b1	chr6:123049962-123071555	+	protein_coding	-0.735672	0.600538	0.00786299	0.353294	2.35971	3.09538	9.18605	5.44579	6.47763	9.34538	7.97894	5.78948	3.26277	2.6986	4.47345	5.07985
ENSMUSG00000026357.3	Rgs18	chr1:144752683-144775435	-	protein_coding	-0.734796	0.600903	0.0487029	0.476875	2.6888	3.42359	12.4297	9.10529	7.50936	8.5575	11.8874	7.46357	5.45086	1.97503	7.86179	6.74205
ENSMUSG00000040229.11	Gpr34	chrX:13632089-13640858	+	protein_coding	-0.733945	0.601258	0.0146385	0.383133	2.56005	3.294	11.0098	7.45376	7.52825	9.24327	9.23476	5.70959	3.31323	2.93339	6.89475	6.9371
ENSMUSG00000036469.16	March1	chr8:65617900-66471637	+	protein_coding	-0.731079	0.602453	0.0291271	0.425086	2.04072	2.77179	6.39947	3.14748	5.28064	9.55945	6.30022	3.14357	3.78603	1.61233	3.73114	3.81106
ENSMUSG00000107011.1	Gm42906	chr5:151063546-151428163	-	protein_coding	-0.726848	0.604223	0.00344993	0.342496	0.810005	1.53685	1.64548	1.47414	1.65312	3.09098	1.89522	1.21504	0.566542	0.357694	0.909507	0.841336
ENSMUSG00000036526.8	Card11	chr5:140872990-141000582	-	protein_coding	-0.723405	0.605666	0.0309506	0.429218	2.50001	3.22341	9.22365	5.8356	7.1608	11.9359	8.6341	7.23595	3.14247	2.64433	5.56115	6.10098
ENSMUSG00000044827.10	Tlr1	chr5:64924679-64933563	-	protein_coding	-0.721227	0.606581	0.0161	0.387111	2.20971	2.93094	7.6298	4.96846	4.76074	8.75113	7.91465	5.02915	2.84601	2.29076	3.50918	5.15581
ENSMUSG00000043832.13	Clec4a3	chr6:122952515-122969875	+	protein_coding	-0.716521	0.608563	0.0423546	0.461616	3.3807	4.09722	17.7503	10.4401	12.3441	27.8485	16.7861	11.5669	9.44101	5.2801	11.2622	11.1325
ENSMUSG00000032725.10	Folr2	chr7:101839988-101857194	-	protein_coding	-0.715144	0.609144	0.0488844	0.476875	4.41777	5.13292	39.6585	35.8358	30.3202	27.7035	38.5031	24.7563	21.7624	9.00212	21.6984	32.5139
ENSMUSG00000105326.1	6030400A10Rik	chr5:43265157-43266368	+	TEC	-0.714616	0.609367	0.0020885	0.33381	2.48588	3.2005	8.3987	8.99603	5.76803	10.1328	8.27399	4.45177	4.63385	5.96502	4.85219	3.40594
ENSMUSG00000029380.11	Cxcl1	chr5:90891241-90893115	+	protein_coding	-0.714093	0.609588	0.0074378	0.353294	1.67288	2.38697	2.82861	4.50961	5.01735	3.4183	5.98114	2.74364	2.91652	1.48848	1.72379	2.31612
ENSMUSG00000052593.15	Adam17	chr12:21323509-21373632	-	protein_coding	-0.713209	0.609962	0.00860685	0.353294	3.18649	3.8997	15.3936	10.5317	12.3346	17.4991	14.883	9.71943	8.36244	5.21498	11.2255	7.2012
ENSMUSG00000000982.5	Ccl3	chr11:83647844-83649355	-	protein_coding	-0.712407	0.610301	0.0328768	0.435182	2.26227	2.97467	6.37396	6.93664	6.24037	5.24957	10.334	5.6543	4.05626	1.64132	3.57583	5.24926
ENSMUSG00000058163.13	Gm5431	chr11:48887422-48902152	-	protein_coding	-0.710952	0.610917	0.0497267	0.479941	1.38714	2.09809	2.59254	1.57782	3.64102	7.44448	2.96375	1.64793	1.90897	0.872586	2.01273	1.81714
ENSMUSG00000032712.16	2810474O19Rik	chr6:149309414-149335663	+	protein_coding	-0.707614	0.612332	0.0493436	0.478334	3.07232	3.77993	15.6299	6.61933	14.2098	15.887	14.0273	6.87038	8.34464	3.89499	8.82592	10.9018
ENSMUSG00000036086.16	Zranb3	chr1:127954184-128103047	-	protein_coding	-0.706115	0.612969	0.00932408	0.353862	2.18314	2.88925	7.64635	6.67733	5.70598	5.48216	6.73634	4.9768	3.0309	1.85715	3.98934	4.62478
ENSMUSG00000106646.1	Gm42483	chr5:58047331-58049072	+	TEC	-0.700324	0.615434	0.00116269	0.310101	0.813046	1.51337	2.71831	1.33249	1.53575	1.87202	2.00185	0.967048	0.947198	0.429335	0.703186	0.79529
ENSMUSG00000027199.14	Gatm	chr2:122594467-122611303	-	protein_coding	-0.697775	0.616522	0.00295663	0.342496	2.4045	3.10227	8.87789	6.26068	6.14204	7.30073	9.98516	4.67029	3.27696	3.5992	4.69863	5.54539
ENSMUSG00000035373.2	Ccl7	chr11:82045712-82047525	+	protein_coding	-0.696404	0.617109	0.0206657	0.398094	2.29221	2.98861	6.38626	6.12788	7.10378	9.20541	6.23442	4.94749	3.81222	1.71625	4.76312	5.29228
ENSMUSG00000004730.14	Adgre1	chr17:57358686-57483529	+	protein_coding	-0.695613	0.617447	0.0442549	0.463453	5.32516	6.02077	67.8892	51.3417	57.5321	76.7749	69.2963	54.9753	33.7666	19.549	44.3774	56.0653
ENSMUSG00000099974.1	Bcl2a1d	chr9:88723285-88731914	-	protein_coding	-0.694963	0.617725	0.0194821	0.395676	2.4817	3.17667	8.16974	6.11301	6.3366	14.6942	7.04851	6.61118	4.09056	3.84213	4.43142	4.33542
ENSMUSG00000022901.13	Cd86	chr16:36603869-36666081	-	protein_coding	-0.692352	0.618844	0.00808103	0.353294	1.69719	2.38954	4.18274	3.47601	3.46905	6.58861	4.02099	2.64821	2.00205	1.29273	2.78003	2.77726
ENSMUSG00000040747.9	Cd53	chr3:106759921-106790149	-	protein_coding	-0.688686	0.620419	0.0229071	0.407581	4.7734	5.46208	45.101	29.6814	37.1742	62.2062	47.7683	30.8753	28.5733	16.2502	27.0848	32.5009
ENSMUSG00000022667.17	Cd200r1	chr16:44765736-44794978	+	protein_coding	-0.686676	0.621284	0.0451795	0.466199	3.48084	4.16752	18.1245	12.2718	16.5977	21.0448	18.0308	11.6806	10.376	4.56905	12.5323	14.9554
ENSMUSG00000103390.1	Gm38301	chr1:127406776-127407318	+	TEC	-0.68343	0.622683	0.00836009	0.353294	0.798497	1.48193	2.27187	0.894854	1.79321	2.3389	1.94064	0.859317	0.76188	0.273591	1.21907	0.719205
ENSMUSG00000104164.1	Gm38248	chr1:127978905-127984687	-	TEC	-0.679233	0.624497	0.0134393	0.379286	1.59495	2.27419	5.5122	3.56953	3.46641	2.94312	4.05353	2.71535	1.67783	0.964209	2.5059	2.67175
ENSMUSG00000069609.7	Cd300ld4	chr11:115020728-115027012	-	protein_coding	-0.677945	0.625055	0.0366451	0.446623	3.5799	4.25784	22.3456	13.2251	16.4692	19.156	20.9155	14.7568	9.85029	5.5168	13.4752	14.1604
ENSMUSG00000063245.11	Gm13248	chr4:146610961-146658160	+	protein_coding	-0.676701	0.625594	0.00303666	0.342496	2.97479	3.65149	13.5124	10.5128	8.66163	14.2737	11.7094	6.08324	7.22546	5.21398	7.73682	8.49265
ENSMUSG00000025044.16	Msr1	chr8:39581685-39642673	-	protein_coding	-0.675296	0.626204	0.0269744	0.416588	2.47164	3.14693	8.41779	5.73517	7.35604	9.52884	8.77079	5.13026	4.63052	2.06754	5.76017	6.33518
ENSMUSG00000029254.16	Stap1	chr5:86071746-86106125	+	protein_coding	-0.671629	0.627797	0.0109593	0.362978	2.14312	2.81475	6.19578	9.00269	4.38217	6.27999	5.11413	3.57538	2.55629	5.23821	2.95043	3.19359
ENSMUSG00000039217.12	Il18	chr9:50575273-50581837	+	protein_coding	-0.668295	0.62925	0.0152142	0.383643	1.6484	2.31669	6.04156	3.57708	3.00291	4.64427	3.2143	1.3795	2.96029	1.44681	2.53369	2.7157
ENSMUSG00000048572.4	Tmem252	chr19:24674008-24679661	+	protein_coding	-0.665682	0.63039	0.0313493	0.43115	2.18259	2.84827	3.88985	4.26754	9.47429	7.96094	7.01115	2.4049	4.58486	2.87419	4.01775	4.21576
ENSMUSG00000015947.10	Fcgr1	chr3:96282909-96293969	-	protein_coding	-0.664558	0.630882	0.034473	0.44075	2.57113	3.23569	8.60802	7.56478	6.8016	11.0983	8.54866	7.55723	3.68541	2.72208	4.76142	7.62077
ENSMUSG00000110235.1	RP23-116E3.2	chr13:97559971-97583996	+	lincRNA	-0.66402	0.631117	0.0056711	0.342496	1.01244	1.67646	2.87034	2.14662	2.08445	1.74912	2.23117	1.78747	0.447546	1.0087	1.27767	0.809781
ENSMUSG00000027408.7	Cpxm1	chr2:130390775-130397574	-	protein_coding	-0.662833	0.631637	0.0287082	0.42291	4.08573	4.74857	29.5985	19.9519	24.9497	27.0599	29.0721	24.1488	10.518	11.0985	16.9257	21.4667
ENSMUSG00000028238.6	Atp6v0d2	chr4:19876841-19922605	-	protein_coding	-0.662704	0.631693	0.0286455	0.42291	6.04973	6.71244	115.328	86.9071	104.443	106.401	108.52	81.7961	57.7967	35.5433	77.3596	90.5155
ENSMUSG00000069792.5	Wfdc17	chr11:83703991-83706268	+	protein_coding	-0.6592	0.633229	0.00237382	0.33381	3.86744	4.52664	23.4592	18.2904	17.4821	28.4874	24.2987	14.2009	12.594	12.4506	12.2767	16.9484
ENSMUSG00000069793.11	Slfn9	chr11:82979629-82991830	-	protein_coding	-0.658086	0.633718	0.0324408	0.435182	1.79045	2.44854	5.55211	3.6485	2.71525	5.8952	5.21141	2.84541	1.74941	1.35557	3.67313	3.25612
ENSMUSG00000025154.14	Arhgap19	chr19:41766588-41802084	-	protein_coding	-0.652077	0.636363	0.00342304	0.342496	2.07864	2.73071	6.39573	4.66889	4.44099	6.83466	6.21033	4.33514	2.53514	2.90687	2.71086	3.91815
ENSMUSG00000105877.1	Gm42479	chr5:57925620-57926975	+	TEC	-0.651235	0.636735	0.00231435	0.33381	0.760069	1.4113	1.89653	1.38328	1.14	1.88036	2.12831	0.591645	1.18364	0.384968	0.769972	0.635249
ENSMUSG00000022788.16	Fgd4	chr16:16416917-16600549	-	protein_coding	-0.650567	0.63703	0.00633312	0.350571	2.78798	3.43854	12.4429	8.08483	8.16763	10.6988	10.4372	6.86203	6.13169	3.75258	6.2073	7.18265
ENSMUSG00000067916.9	Gm13139	chr4:147132038-147180579	+	protein_coding	-0.649659	0.637431	0.000819028	0.30045	3.39754	4.0472	16.8766	15.0576	12.685	18.4755	15.1417	9.4576	9.33693	7.46269	11.1636	10.6793
ENSMUSG00000027698.14	Nceh1	chr3:27182965-27284608	+	protein_coding	-0.642905	0.640422	0.0427335	0.461616	4.09882	4.74172	26.99	18.5619	27.466	27.6358	29.7152	21.1078	15.6133	8.15101	18.0885	22.0193
ENSMUSG00000030064.16	Frmd4b	chr6:97286867-97617541	-	protein_coding	-0.637113	0.642998	0.0486431	0.476875	3.32082	3.95793	17.917	9.24026	13.9667	15.4996	17.9459	9.99681	11.3188	4.62353	8.83138	12.3005
ENSMUSG00000052688.12	Rab7b	chr1:131688695-131715439	+	protein_coding	-0.634734	0.644059	0.0470876	0.473678	3.72086	4.35559	20.2856	14.5113	20.4797	20.4577	22.6309	14.6909	14.0775	5.67443	13.3938	16.5342
ENSMUSG00000036585.15	Fgf1	chr18:38838673-38929404	-	protein_coding	-0.631854	0.645346	0.0366174	0.446623	4.42517	5.05702	38.6845	21.3359	39.3101	27.4716	39.1906	18.2613	33.7288	15.2691	19.6904	19.325
ENSMUSG00000015355.13	Cd48	chr1:171682009-171705258	+	protein_coding	-0.625823	0.64805	0.0355832	0.443392	3.59391	4.21973	17.6887	11.6965	15.1914	25.1451	21.3558	12.8112	11.2251	6.73848	11.8411	14.2979
ENSMUSG00000026360.9	Rgs2	chr1:143999338-144004161	-	protein_coding	-0.625133	0.64836	0.0394847	0.453687	3.09617	3.7213	14.3453	9.93393	9.14253	15.5765	13.149	10.9267	6.02722	4.31805	8.61386	9.67196
ENSMUSG00000021950.15	Anxa8	chr14:34085981-34100571	+	protein_coding	-0.624794	0.648512	0.0204753	0.398084	2.29692	2.92171	8.03028	4.07797	8.4545	6.36383	6.82494	5.29619	4.02901	2.41763	3.76269	4.55993
ENSMUSG00000070605.4	Gm13251	chr4:146449023-146470292	+	protein_coding	-0.61795	0.651596	0.000641218	0.285138	2.59337	3.21132	9.28957	7.98909	6.45001	9.83639	8.12777	4.97997	4.71239	4.2915	5.45834	5.85797
ENSMUSG00000001131.11	Timp1	chrX:20870166-20874735	+	protein_coding	-0.613538	0.653592	0.00795121	0.353294	3.02591	3.63945	12.0544	8.8586	12.6569	12.0298	12.1237	6.95613	6.35531	5.56352	6.66137	11.1817
ENSMUSG00000071042.11	Rasgrp3	chr17:75435905-75529043	+	protein_coding	-0.594353	0.662341	0.0401293	0.454267	2.70116	3.29551	12.0299	7.32566	9.07278	7.39744	8.94446	7.47862	5.11104	2.76679	7.03187	6.42025
ENSMUSG00000039899.5	Fgl2	chr5:21372642-21378374	+	protein_coding	-0.59166	0.663579	0.0140451	0.37986	3.74407	4.33573	22.4682	14.6552	16.0246	30.0968	16.2583	13.9989	12.1428	12.0538	11.993	11.918
ENSMUSG00000041552.7	Ptchd1	chrX:155573455-155623814	-	protein_coding	-0.588369	0.665094	0.0429942	0.461616	1.66808	2.25645	5.31179	3.08225	3.09301	3.51344	4.23224	3.52686	1.43997	1.07599	2.56447	2.96555
ENSMUSG00000020189.13	Osbpl8	chr10:111164802-111297247	+	protein_coding	-0.587703	0.665402	0.00892444	0.353294	4.52338	5.11108	37.3842	27.8316	30.4082	37.9564	35.4168	26.7222	21.6149	14.5772	24.2208	25.1152
ENSMUSG00000038910.6	Plcl2	chr17:50509547-50688493	+	protein_coding	-0.586458	0.665976	0.0171972	0.390361	3.36986	3.95632	17.0316	10.0545	13.8663	17.2762	15.6413	11.3113	9.30584	6.09537	9.94033	10.9881
ENSMUSG00000072620.3	Slfn2	chr11:83065112-83070678	+	protein_coding	-0.585538	0.666401	0.0310526	0.429218	4.1661	4.75164	25.1363	17.8234	25.6355	37.2682	27.2936	19.4474	18.5472	10.7604	18.1391	19.727
