# Supplementary material for: Salvianolic acid B plays an anti-obesity role in high fat diet-induced obese mice by regulating the expression of mRNA, circRNA, and lncRNA
Source: PeerJ. 2019 Feb 28;7:e6506. doi: 10.7717/peerj.6506 (PMC6397762; doi:10.7717/peerj.6506)
Supplement: Supplemental Information 3 [file peerj-07-6506-s003.xlsx]

## Sheet: down_EP-S_vs_EP-M
#log2FC <= -0.585 #p-value cut-off <= 0.05 #q-value cut-off <= 1.00 #Condition pair: down_EP-S_vs_EP-M Column A: lncRNA_id, The transcript id of lncRNA. Column B: Locus, The genomic coordinates of lncRNA. Column C: Strand, The strand of lncRNA. Column D: Relationship, The relationship between the lncRNA and neighbor protein_coding transcript. Column E: Associated_trans_id, The id of neighbor prot…
lncRNA Information			lncRNA Class							Differential Expression
lncRNA_id	Locus	Strand	Relationship	Associated_trans_id	Associated_gene_name	Associated_protein_id	Associated_gene_strand	Associated_gene_start	Associated_gene_end	log2FC	Fold_Change	p_value	q_value	EP-S_FPKM	EP-M_FPKM	EP-M11	EP-M12	EP-M13	EP-M7	EP-M9	EP-S20	EP-S6	EP-S7	EP-S8	EP-S9
ENSMUST00000112694	chr5:106617073-106624390	-	exon sense-overlapping	ENSMUST00000112698.7	Zfp644	ENSMUSP00000108318.1	-	106616742	106696830	-1.21998	0.429287	0.0186682	0.602091	0.964203	2.18419	4.50894	4.21799	2.71166	3.43136	3.10066	0.304837	0.847894	4.78022	0.470979	0.378749
ENSMUST00000112694	chr5:106617073-106624390	-	exon sense-overlapping	ENSMUST00000112696.7	Zfp644	ENSMUSP00000108316.1	-	106616739	106696830	-1.21998	0.429287	0.0186682	0.602091	0.964203	2.18419	4.50894	4.21799	2.71166	3.43136	3.10066	0.304837	0.847894	4.78022	0.470979	0.378749
ENSMUST00000112694	chr5:106617073-106624390	-	exon sense-overlapping	ENSMUST00000045466.13	Zfp644	ENSMUSP00000038047.7	-	106616741	106695975	-1.21998	0.429287	0.0186682	0.602091	0.964203	2.18419	4.50894	4.21799	2.71166	3.43136	3.10066	0.304837	0.847894	4.78022	0.470979	0.378749
ENSMUST00000112694	chr5:106617073-106624390	-	exon sense-overlapping	ENSMUST00000112695.3	Zfp644	ENSMUSP00000108315.1	-	106616744	106696597	-1.21998	0.429287	0.0186682	0.602091	0.964203	2.18419	4.50894	4.21799	2.71166	3.43136	3.10066	0.304837	0.847894	4.78022	0.470979	0.378749
ENSMUST00000129282	chr10:81590905-81592715	-	exon sense-overlapping	ENSMUST00000072020.8	Tle6	ENSMUSP00000071905.2	-	81590905	81600900	-0.688919	0.620318	0.0209513	0.603778	0.395319	1.08424	0.71998	2.30408	1.16488	0.647946	1.11344	0.437683	0.780836	0.029956	0	0.49248
ENSMUST00000129282	chr10:81590905-81592715	-	exon sense-overlapping	ENSMUST00000142948.7	Tle6	ENSMUSP00000117287.1	-	81590904	81600875	-0.688919	0.620318	0.0209513	0.603778	0.395319	1.08424	0.71998	2.30408	1.16488	0.647946	1.11344	0.437683	0.780836	0.029956	0	0.49248
ENSMUST00000131732	chr1:127996853-128018693	-	exon sense-overlapping	ENSMUST00000086614.11	Zranb3	ENSMUSP00000083806.5	-	127954184	128102462	-1.1925	0.437543	0.0057324	0.544501	1.53726	2.72976	7.02866	4.78469	8.29425	4.64883	4.26756	2.34292	1.41973	1.13474	1.07128	4.75883
ENSMUST00000131732	chr1:127996853-128018693	-	exon sense-overlapping	ENSMUST00000112538.3	Zranb3	ENSMUSP00000108157.2	-	127954670	128103001	-1.1925	0.437543	0.0057324	0.544501	1.53726	2.72976	7.02866	4.78469	8.29425	4.64883	4.26756	2.34292	1.41973	1.13474	1.07128	4.75883
ENSMUST00000132596	chr2:25455141-25460200	-	exon sense-overlapping	ENSMUST00000114261.8	BC029214	ENSMUSP00000109899.2	-	25459482	25461094	-0.658428	0.633568	0.0352964	0.630822	0.44787	1.1063	1.54399	0.515227	1.09923	1.29769	1.48771	1.26469	0	0.31356	0	0.587275
ENSMUST00000132596	chr2:25455141-25460200	-	exon sense-overlapping	ENSMUST00000151239.1	BC029214	ENSMUSP00000120533.1	-	25459815	25461031	-0.658428	0.633568	0.0352964	0.630822	0.44787	1.1063	1.54399	0.515227	1.09923	1.29769	1.48771	1.26469	0	0.31356	0	0.587275
ENSMUST00000132596	chr2:25455141-25460200	-	intronic antisense	ENSMUST00000114265.8	Clic3	ENSMUSP00000109904.2	+	25456838	25458776	-0.658428	0.633568	0.0352964	0.630822	0.44787	1.1063	1.54399	0.515227	1.09923	1.29769	1.48771	1.26469	0	0.31356	0	0.587275
ENSMUST00000132596	chr2:25455141-25460200	-	intronic antisense	ENSMUST00000102918.2	Clic3	ENSMUSP00000099982.2	+	25456849	25458776	-0.658428	0.633568	0.0352964	0.630822	0.44787	1.1063	1.54399	0.515227	1.09923	1.29769	1.48771	1.26469	0	0.31356	0	0.587275
ENSMUST00000133649	chr2:18064805-18123812	+	exon sense-overlapping	ENSMUST00000114680.8	Mllt10	ENSMUSP00000110328.2	+	18064687	18210970	-0.886351	0.540981	0.0398758	0.644037	2.2442	3.13056	7.5815	6.14192	8.69989	6.86379	10.0199	1.21948	4.50944	3.93325	8.72548	3.06875
ENSMUST00000133649	chr2:18064805-18123812	+	exon sense-overlapping	ENSMUST00000114671.7	Mllt10	ENSMUSP00000110319.1	+	18064636	18212388	-0.886351	0.540981	0.0398758	0.644037	2.2442	3.13056	7.5815	6.14192	8.69989	6.86379	10.0199	1.21948	4.50944	3.93325	8.72548	3.06875
ENSMUST00000133649	chr2:18064805-18123812	+	exon sense-overlapping	ENSMUST00000028076.14	Mllt10	ENSMUSP00000028076.8	+	18055237	18212387	-0.886351	0.540981	0.0398758	0.644037	2.2442	3.13056	7.5815	6.14192	8.69989	6.86379	10.0199	1.21948	4.50944	3.93325	8.72548	3.06875
ENSMUST00000134999	chr11:86700938-86702430	-	exon sense-overlapping	ENSMUST00000124385.1	Cltc	ENSMUSP00000117674.1	-	86695317	86703697	-0.621915	0.649808	0.00779051	0.579343	1.61986	2.24178	4.68945	3.20299	2.42487	4.49376	4.26101	2.07234	1.74466	1.91169	3.0989	1.72501
ENSMUST00000134999	chr11:86700938-86702430	-	exon sense-overlapping	ENSMUST00000060766.15	Cltc	ENSMUSP00000050220.9	-	86694655	86757501	-0.621915	0.649808	0.00779051	0.579343	1.61986	2.24178	4.68945	3.20299	2.42487	4.49376	4.26101	2.07234	1.74466	1.91169	3.0989	1.72501
ENSMUST00000134999	chr11:86700938-86702430	-	exon sense-overlapping	ENSMUST00000103186.10	Cltc	ENSMUSP00000099475.4	-	86694351	86757565	-0.621915	0.649808	0.00779051	0.579343	1.61986	2.24178	4.68945	3.20299	2.42487	4.49376	4.26101	2.07234	1.74466	1.91169	3.0989	1.72501
ENSMUST00000136915	chrX:20680595-20682205	+	exon sense-overlapping	ENSMUST00000089217.10	Uba1	ENSMUSP00000086626.4	+	20658326	20683179	-0.964873	0.512324	0.042125	0.647851	2.37871	3.34358	12.9096	11.1437	5.6756	12.5283	6.06624	2.69347	3.62748	2.72207	3.80079	11.4576
ENSMUST00000136915	chrX:20680595-20682205	+	exon sense-overlapping	ENSMUST00000001989.8	Uba1	ENSMUSP00000001989.8	+	20662898	20683179	-0.964873	0.512324	0.042125	0.647851	2.37871	3.34358	12.9096	11.1437	5.6756	12.5283	6.06624	2.69347	3.62748	2.72207	3.80079	11.4576
ENSMUST00000137871	chr3:109341106-109442212	+	exon sense-overlapping	ENSMUST00000046864.13	Vav3	ENSMUSP00000036270.7	+	109340653	109685698	-0.710792	0.610985	0.0127289	0.591151	1.15147	1.86227	3.88687	2.49187	3.00388	1.69458	2.45087	2.01912	1.60521	0.538806	0.887001	1.36845
ENSMUST00000139273	chr1:52191200-52215594	-	exon sense-overlapping	ENSMUST00000155587.7	Gls	ENSMUSP00000115358.1	-	52185280	52212209	-0.881107	0.542951	0.0175552	0.601141	0.400186	1.28129	2.55954	1.41099	0.901247	1.66037	0.954203	0	1.02676	0.974864	0	0
ENSMUST00000139273	chr1:52191200-52215594	-	exon sense-overlapping	ENSMUST00000114510.7	Gls	ENSMUSP00000110155.1	-	52184104	52233232	-0.881107	0.542951	0.0175552	0.601141	0.400186	1.28129	2.55954	1.41099	0.901247	1.66037	0.954203	0	1.02676	0.974864	0	0
ENSMUST00000139273	chr1:52191200-52215594	-	exon sense-overlapping	ENSMUST00000114512.7	Gls	ENSMUSP00000110157.1	-	52165941	52232296	-0.881107	0.542951	0.0175552	0.601141	0.400186	1.28129	2.55954	1.41099	0.901247	1.66037	0.954203	0	1.02676	0.974864	0	0
ENSMUST00000139273	chr1:52191200-52215594	-	exon sense-overlapping	ENSMUST00000114513.8	Gls	ENSMUSP00000110158.2	-	52163448	52233223	-0.881107	0.542951	0.0175552	0.601141	0.400186	1.28129	2.55954	1.41099	0.901247	1.66037	0.954203	0	1.02676	0.974864	0	0
ENSMUST00000139959	chr11:48800357-48806088	+	exon sense-overlapping	ENSMUST00000020640.7	Rack1	ENSMUSP00000020640.7	+	48800360	48806434	-0.632667	0.644983	0.0488972	0.661161	2.57748	3.21014	8.78947	10.5346	6.41836	10.892	5.81427	6.11381	4.91946	2.39385	7.20683	5.46004
ENSMUST00000140086	chr2:83657113-83661534	+	exon sense-overlapping	ENSMUST00000081591.6	Zc3h15	ENSMUSP00000080301.6	+	83644435	83664622	-0.631136	0.645668	0.0242591	0.608792	2.22381	2.85494	6.75127	7.67814	9.63725	4.88987	3.70308	3.82441	4.31355	3.1766	4.36272	2.8737
ENSMUST00000142667	chr9:48331465-48353454	-	exon sense-overlapping	ENSMUST00000137976.1	Nxpe2	ENSMUSP00000116684.1	-	48326393	48353454	-0.612663	0.653988	0.0303671	0.618465	0.256622	0.869285	1.21075	1.31123	1.0052	0.631469	0.216985	0	0	0	0.65899	0.466935
ENSMUST00000142667	chr9:48331465-48353454	-	exon sense-overlapping	ENSMUST00000034527.13	Nxpe2	ENSMUSP00000034527.7	-	48318006	48340898	-0.612663	0.653988	0.0303671	0.618465	0.256622	0.869285	1.21075	1.31123	1.0052	0.631469	0.216985	0	0	0	0.65899	0.466935
ENSMUST00000145230	chr2:180171659-180176286	+	exon sense-overlapping	ENSMUST00000061437.4	Adrm1	ENSMUSP00000050076.4	+	180171485	180176286	-0.789642	0.578488	0.0240639	0.608792	0.369244	1.15889	0.173756	2.11963	1.39816	1.49627	1.5319	0	0.109739	0.83252	0.4051	0.258318
ENSMUST00000145927	chr11:53532051-53537279	+	exon sense-overlapping	ENSMUST00000108987.7	Sept8	ENSMUSP00000104615.1	+	53519746	53544095	-0.589415	0.664612	0.00728613	0.574682	0	0.589415	0.717202	0.842379	0	0.371182	0.777717	0	0	0	0	0
ENSMUST00000145927	chr11:53532051-53537279	+	exon sense-overlapping	ENSMUST00000120878.8	Sept8	ENSMUSP00000113775.2	+	53519908	53541898	-0.589415	0.664612	0.00728613	0.574682	0	0.589415	0.717202	0.842379	0	0.371182	0.777717	0	0	0	0	0
ENSMUST00000145927	chr11:53532051-53537279	+	exon sense-overlapping	ENSMUST00000117061.7	Sept8	ENSMUSP00000112920.1	+	53519800	53544096	-0.589415	0.664612	0.00728613	0.574682	0	0.589415	0.717202	0.842379	0	0.371182	0.777717	0	0	0	0	0
ENSMUST00000145927	chr11:53532051-53537279	+	exon sense-overlapping	ENSMUST00000121334.7	Sept8	ENSMUSP00000113038.1	+	53519770	53549565	-0.589415	0.664612	0.00728613	0.574682	0	0.589415	0.717202	0.842379	0	0.371182	0.777717	0	0	0	0	0
ENSMUST00000145927	chr11:53532051-53537279	+	exon sense-overlapping	ENSMUST00000147912.1	Sept8	ENSMUSP00000120427.1	+	53519927	53541847	-0.589415	0.664612	0.00728613	0.574682	0	0.589415	0.717202	0.842379	0	0.371182	0.777717	0	0	0	0	0
ENSMUST00000145927	chr11:53532051-53537279	+	exon sense-overlapping	ENSMUST00000142800.1	Sept8	ENSMUSP00000124057.1	+	53519257	53534616	-0.589415	0.664612	0.00728613	0.574682	0	0.589415	0.717202	0.842379	0	0.371182	0.777717	0	0	0	0	0
ENSMUST00000146545	chr2:58147559-58160119	-	exon sense-overlapping	ENSMUST00000028175.6	Cytip	ENSMUSP00000028175.6	-	58129137	58160495	-0.669435	0.628753	0.0190237	0.60327	1.39493	2.06436	3.44711	1.56062	4.49623	4.49965	2.71839	1.18636	1.32822	1.64708	2.03829	2.07211
ENSMUST00000147779	chr2:28840406-28847511	+	exon sense-overlapping	ENSMUST00000113853.2	Ddx31	ENSMUSP00000109484.2	+	28840459	28905571	-0.654241	0.63541	0.0104704	0.581833	0.0617789	0.71602	1.33731	0.334304	0.216214	1.21227	0.425269	0.059218	0.002199	0.01118	0.051974	0.097018
ENSMUST00000148315	chr2:22774390-22856086	+	exon sense-overlapping	ENSMUST00000014290.14	Apbb1ip	ENSMUSP00000014290.8	+	22774094	22875653	-0.77024	0.58632	0.040439	0.644768	2.48195	3.25219	10.3982	5.41755	7.96412	9.54515	10.3571	5.44651	5.67511	1.61726	6.0255	5.87699
ENSMUST00000149755	chr4:130316695-130344859	-	exon sense-overlapping	ENSMUST00000134159.2	Zcchc17	ENSMUSP00000120807.2	-	130315383	130359943	-0.892343	0.538739	0.0457067	0.65478	0.601631	1.49397	1.21456	5.83631	1.07474	0.896488	1.97599	0.057667	0.598565	0.633344	1.1501	0.354974
ENSMUST00000149883	chr14:75176208-75198142	+	exon sense-overlapping	ENSMUST00000145303.7	Lcp1	ENSMUSP00000116271.1	+	75136332	75230842	-1.02484	0.491464	0.0204584	0.603778	1.03251	2.05735	2.73742	2.23795	3.55442	3.94577	3.5826	1.06031	0.076297	2.27888	2.55761	0.384626
ENSMUST00000149883	chr14:75176208-75198142	+	exon sense-overlapping	ENSMUST00000143539.7	Lcp1	ENSMUSP00000118721.1	+	75131101	75199444	-1.02484	0.491464	0.0204584	0.603778	1.03251	2.05735	2.73742	2.23795	3.55442	3.94577	3.5826	1.06031	0.076297	2.27888	2.55761	0.384626
ENSMUST00000149883	chr14:75176208-75198142	+	exon sense-overlapping	ENSMUST00000134114.7	Lcp1	ENSMUSP00000121376.1	+	75131159	75200514	-1.02484	0.491464	0.0204584	0.603778	1.03251	2.05735	2.73742	2.23795	3.55442	3.94577	3.5826	1.06031	0.076297	2.27888	2.55761	0.384626
ENSMUST00000149883	chr14:75176208-75198142	+	exon sense-overlapping	ENSMUST00000125833.7	Lcp1	ENSMUSP00000116033.1	+	75131499	75200463	-1.02484	0.491464	0.0204584	0.603778	1.03251	2.05735	2.73742	2.23795	3.55442	3.94577	3.5826	1.06031	0.076297	2.27888	2.55761	0.384626
ENSMUST00000149883	chr14:75176208-75198142	+	exon sense-overlapping	ENSMUST00000122840.7	Lcp1	ENSMUSP00000117984.1	+	75136475	75200454	-1.02484	0.491464	0.0204584	0.603778	1.03251	2.05735	2.73742	2.23795	3.55442	3.94577	3.5826	1.06031	0.076297	2.27888	2.55761	0.384626
ENSMUST00000149883	chr14:75176208-75198142	+	exon sense-overlapping	ENSMUST00000131802.1	Lcp1	ENSMUSP00000117137.1	+	75190329	75230816	-1.02484	0.491464	0.0204584	0.603778	1.03251	2.05735	2.73742	2.23795	3.55442	3.94577	3.5826	1.06031	0.076297	2.27888	2.55761	0.384626
ENSMUST00000149883	chr14:75176208-75198142	+	exon sense-overlapping	ENSMUST00000124499.7	Lcp1	ENSMUSP00000121201.1	+	75131554	75229796	-1.02484	0.491464	0.0204584	0.603778	1.03251	2.05735	2.73742	2.23795	3.55442	3.94577	3.5826	1.06031	0.076297	2.27888	2.55761	0.384626
ENSMUST00000151026	chr4:126914948-126923196	-	exon sense-overlapping	ENSMUST00000135003.1	Zmym4	ENSMUSP00000120813.1	-	126861939	126923148	-0.685844	0.621642	0.0167659	0.601141	0.790096	1.47594	3.63644	1.31077	0.94052	2.04829	1.62782	0.579877	0.571799	0.715017	1.13269	0.702144
ENSMUST00000151026	chr4:126914948-126923196	-	exon sense-overlapping	ENSMUST00000106108.8	Zmym4	ENSMUSP00000101714.2	-	126861939	126968135	-0.685844	0.621642	0.0167659	0.601141	0.790096	1.47594	3.63644	1.31077	0.94052	2.04829	1.62782	0.579877	0.571799	0.715017	1.13269	0.702144
ENSMUST00000153033	chr2:144254794-144260762	-	exon sense-overlapping	ENSMUST00000028909.4	Snx5	ENSMUSP00000028909.4	-	144250123	144270572	-0.684949	0.622028	0.00188046	0.501667	2.58753	3.27248	11.2368	8.622	6.13163	10.4528	7.76059	4.72124	5.88607	5.2808	4.59701	4.66477
ENSMUST00000153033	chr2:144254794-144260762	-	exon sense-overlapping	ENSMUST00000110030.9	Snx5	ENSMUSP00000105657.3	-	144250123	144270906	-0.684949	0.622028	0.00188046	0.501667	2.58753	3.27248	11.2368	8.622	6.13163	10.4528	7.76059	4.72124	5.88607	5.2808	4.59701	4.66477
ENSMUST00000154400	chrX:70461054-70470179	-	exon sense-overlapping	ENSMUST00000101506.9	BC023829	ENSMUSP00000099043.3	-	70459753	70477180	-1.23655	0.424385	0.0451725	0.654153	0.345112	1.58167	1.41694	0	5.26608	2.06024	4.18355	0	0	1.24499	0	0.473093
ENSMUST00000154400	chrX:70461054-70470179	-	exon sense-overlapping	ENSMUST00000114630.2	BC023829	ENSMUSP00000110277.2	-	70460959	70477180	-1.23655	0.424385	0.0451725	0.654153	0.345112	1.58167	1.41694	0	5.26608	2.06024	4.18355	0	0	1.24499	0	0.473093
ENSMUST00000156057	chr2:69863291-69869150	+	exon sense-overlapping	ENSMUST00000112260.2	Ssb	ENSMUSP00000107879.1	+	69861686	69867552	-0.652944	0.635981	4.99462e-05	0.269539	1.18441	1.83735	2.41746	2.29532	2.6647	3.11853	2.4285	1.42759	1.47622	1.39375	1.0291	1.07665
ENSMUST00000156057	chr2:69863291-69869150	+	exon sense-overlapping	ENSMUST00000090852.10	Ssb	ENSMUSP00000088365.4	+	69861562	69871786	-0.652944	0.635981	4.99462e-05	0.269539	1.18441	1.83735	2.41746	2.29532	2.6647	3.11853	2.4285	1.42759	1.47622	1.39375	1.0291	1.07665
ENSMUST00000156057	chr2:69863291-69869150	+	exon sense-overlapping	ENSMUST00000166411.7	Ssb	ENSMUSP00000130313.1	+	69861562	69871846	-0.652944	0.635981	4.99462e-05	0.269539	1.18441	1.83735	2.41746	2.29532	2.6647	3.11853	2.4285	1.42759	1.47622	1.39375	1.0291	1.07665
ENSMUST00000156057	chr2:69863291-69869150	+	exon sense-overlapping	ENSMUST00000132603.1	Ssb	ENSMUSP00000115666.1	+	69868779	69871510	-0.652944	0.635981	4.99462e-05	0.269539	1.18441	1.83735	2.41746	2.29532	2.6647	3.11853	2.4285	1.42759	1.47622	1.39375	1.0291	1.07665
ENSMUST00000156230	chr11:115187551-115245764	+	exon sense-overlapping	ENSMUST00000100235.8	Tmem104	ENSMUSP00000097807.2	+	115187487	115247023	-1.42758	0.371753	0.00210234	0.501667	0.463868	1.89145	3.30915	2.86158	1.6596	2.66495	3.33386	1.61114	0	0.91144	0	0
ENSMUST00000156230	chr11:115187551-115245764	+	intronic antisense	ENSMUST00000103041.7	Nat9	ENSMUSP00000099330.1	-	115182832	115187844	-1.42758	0.371753	0.00210234	0.501667	0.463868	1.89145	3.30915	2.86158	1.6596	2.66495	3.33386	1.61114	0	0.91144	0	0
ENSMUST00000156230	chr11:115187551-115245764	+	exon sense-overlapping	ENSMUST00000061450.6	Tmem104	ENSMUSP00000056805.6	+	115187487	115247023	-1.42758	0.371753	0.00210234	0.501667	0.463868	1.89145	3.30915	2.86158	1.6596	2.66495	3.33386	1.61114	0	0.91144	0	0
ENSMUST00000161099	chr9:7866193-7872857	-	exon sense-overlapping	ENSMUST00000013949.14	Birc3	ENSMUSP00000013949.8	-	7848699	7873024	-0.631902	0.645325	0.0494191	0.662763	2.55349	3.1854	6.52877	6.49795	8.71843	11.4093	8.15142	4.15411	7.81298	7.48388	2.8716	3.67339
ENSMUST00000161099	chr9:7866193-7872857	-	intron sense-overlapping	ENSMUST00000159323.1	Birc3	ENSMUSP00000125652.1	-	7860791	7873170	-0.631902	0.645325	0.0494191	0.662763	2.55349	3.1854	6.52877	6.49795	8.71843	11.4093	8.15142	4.15411	7.81298	7.48388	2.8716	3.67339
ENSMUST00000161099	chr9:7866193-7872857	-	exon sense-overlapping	ENSMUST00000115672.1	Birc3	ENSMUSP00000111336.1	-	7855815	7872983	-0.631902	0.645325	0.0494191	0.662763	2.55349	3.1854	6.52877	6.49795	8.71843	11.4093	8.15142	4.15411	7.81298	7.48388	2.8716	3.67339
ENSMUST00000161099	chr9:7866193-7872857	-	intron sense-overlapping	ENSMUST00000115673.2	Birc3	ENSMUSP00000111337.2	-	7860810	7873186	-0.631902	0.645325	0.0494191	0.662763	2.55349	3.1854	6.52877	6.49795	8.71843	11.4093	8.15142	4.15411	7.81298	7.48388	2.8716	3.67339
ENSMUST00000162611	chr5:121711337-121749183	+	exon sense-overlapping	ENSMUST00000051950.13	Atxn2	ENSMUSP00000056715.7	+	121711609	121814950	-1.08751	0.470574	0.0226024	0.60817	0.596255	1.68376	3.52886	2.42038	3.08626	0.814962	1.9789	0.585952	0	0	2.23019	0.54147
ENSMUST00000162732	chr16:64751751-64766656	-	exon sense-overlapping	ENSMUST00000076991.6	4930453N24Rik	ENSMUSP00000076255.6	-	64762136	64771161	-2.02852	0.245107	0.0433049	0.65001	0.0154937	2.04401	6.48905	0	11.4101	0	11.8333	0	0	0	0	0.055165
ENSMUST00000163148	chr7:142650843-142653030	-	exon sense-overlapping	ENSMUST00000105936.7	Igf2	ENSMUSP00000101556.1	-	142650769	142661305	-0.747215	0.595752	0.0408804	0.644865	0	0.747215	1.44959	1.4946	0	1.1806	0	0	0	0	0	0
ENSMUST00000163148	chr7:142650843-142653030	-	exon sense-overlapping	ENSMUST00000097936.8	Igf2	ENSMUSP00000095549.2	-	142650769	142657466	-0.747215	0.595752	0.0408804	0.644865	0	0.747215	1.44959	1.4946	0	1.1806	0	0	0	0	0	0
ENSMUST00000163148	chr7:142650843-142653030	-	exon sense-overlapping	ENSMUST00000121128.7	Igf2	ENSMUSP00000114076.1	-	142650769	142659489	-0.747215	0.595752	0.0408804	0.644865	0	0.747215	1.44959	1.4946	0	1.1806	0	0	0	0	0	0
ENSMUST00000163148	chr7:142650843-142653030	-	exon sense-overlapping	ENSMUST00000000033.11	Igf2	ENSMUSP00000000033.5	-	142650766	142657496	-0.747215	0.595752	0.0408804	0.644865	0	0.747215	1.44959	1.4946	0	1.1806	0	0	0	0	0	0
ENSMUST00000164900	chr1:58711510-58731246	+	exon sense-overlapping	ENSMUST00000069333.7	Cflar	ENSMUSP00000065107.7	+	58713317	58755165	-0.909824	0.53225	0.0248506	0.610152	0.361969	1.27179	1.40671	2.57445	0.366613	2.03684	1.299	0.003055	1.27452	0.036095	0.003086	0.478651
ENSMUST00000164900	chr1:58711510-58731246	+	exon sense-overlapping	ENSMUST00000114309.7	Cflar	ENSMUSP00000109948.1	+	58713294	58733227	-0.909824	0.53225	0.0248506	0.610152	0.361969	1.27179	1.40671	2.57445	0.366613	2.03684	1.299	0.003055	1.27452	0.036095	0.003086	0.478651
ENSMUST00000164900	chr1:58711510-58731246	+	exon sense-overlapping	ENSMUST00000114313.7	Cflar	ENSMUSP00000109952.1	+	58711560	58758884	-0.909824	0.53225	0.0248506	0.610152	0.361969	1.27179	1.40671	2.57445	0.366613	2.03684	1.299	0.003055	1.27452	0.036095	0.003086	0.478651
ENSMUST00000164900	chr1:58711510-58731246	+	exon sense-overlapping	ENSMUST00000097722.8	Cflar	ENSMUSP00000095329.2	+	58711551	58753976	-0.909824	0.53225	0.0248506	0.610152	0.361969	1.27179	1.40671	2.57445	0.366613	2.03684	1.299	0.003055	1.27452	0.036095	0.003086	0.478651
ENSMUST00000165706	chr17:43568635-43589798	+	exon sense-overlapping	ENSMUST00000167418.7	Pla2g7	ENSMUSP00000131898.1	+	43568475	43594917	-0.803461	0.572973	0.034507	0.630056	1.7856	2.58906	3.61087	2.75997	7.47795	8.6363	4.5688	2.15336	2.81318	1.19412	3.43747	3.16048
ENSMUST00000165706	chr17:43568635-43589798	+	exon sense-overlapping	ENSMUST00000167214.7	Pla2g7	ENSMUSP00000130404.1	+	43568098	43600591	-0.803461	0.572973	0.034507	0.630056	1.7856	2.58906	3.61087	2.75997	7.47795	8.6363	4.5688	2.15336	2.81318	1.19412	3.43747	3.16048
ENSMUST00000165706	chr17:43568635-43589798	+	exon sense-overlapping	ENSMUST00000024706.11	Pla2g7	ENSMUSP00000024706.5	+	43568269	43612201	-0.803461	0.572973	0.034507	0.630056	1.7856	2.58906	3.61087	2.75997	7.47795	8.6363	4.5688	2.15336	2.81318	1.19412	3.43747	3.16048
ENSMUST00000165706	chr17:43568635-43589798	+	exon sense-overlapping	ENSMUST00000169694.1	Pla2g7	ENSMUSP00000132027.1	+	43568673	43607263	-0.803461	0.572973	0.034507	0.630056	1.7856	2.58906	3.61087	2.75997	7.47795	8.6363	4.5688	2.15336	2.81318	1.19412	3.43747	3.16048
ENSMUST00000167285	chr7:30945252-30956176	-	exon sense-overlapping	ENSMUST00000108119.9	Usf2	ENSMUSP00000132021.1	-	30946580	30956766	-1.23051	0.426168	0.0447489	0.652225	2.9232	4.1537	17.8461	19.2416	14.7617	15.4285	17.0833	19.2338	14.29	2.35173	3.28673	4.64897
ENSMUST00000167285	chr7:30945252-30956176	-	exon sense-overlapping	ENSMUST00000058860.13	Usf2	ENSMUSP00000132256.1	-	30945248	30956803	-1.23051	0.426168	0.0447489	0.652225	2.9232	4.1537	17.8461	19.2416	14.7617	15.4285	17.0833	19.2338	14.29	2.35173	3.28673	4.64897
ENSMUST00000167285	chr7:30945252-30956176	-	exon sense-overlapping	ENSMUST00000170442.7	Usf2	ENSMUSP00000130298.1	-	30946574	30956239	-1.23051	0.426168	0.0447489	0.652225	2.9232	4.1537	17.8461	19.2416	14.7617	15.4285	17.0833	19.2338	14.29	2.35173	3.28673	4.64897
ENSMUST00000167285	chr7:30945252-30956176	-	exon sense-overlapping	ENSMUST00000162228.8	Usf2	ENSMUSP00000125520.2	-	30946580	30956757	-1.23051	0.426168	0.0447489	0.652225	2.9232	4.1537	17.8461	19.2416	14.7617	15.4285	17.0833	19.2338	14.29	2.35173	3.28673	4.64897
ENSMUST00000167285	chr7:30945252-30956176	-	exon sense-overlapping	ENSMUST00000172417.2	Usf2	ENSMUSP00000132833.1	-	30946580	30956757	-1.23051	0.426168	0.0447489	0.652225	2.9232	4.1537	17.8461	19.2416	14.7617	15.4285	17.0833	19.2338	14.29	2.35173	3.28673	4.64897
ENSMUST00000169194	chr9:21425243-21491426	+	exon sense-overlapping	ENSMUST00000072362.13	Dnm2	ENSMUSP00000072199.7	+	21424945	21507140	-1.6897	0.30999	0.0399144	0.644037	1.14293	2.83264	11.7595	1.21036	12.1604	20.0438	1.34885	1.57462	1.19355	0.758253	1.28096	1.31861
ENSMUST00000169194	chr9:21425243-21491426	+	exon sense-overlapping	ENSMUST00000115404.10	Dnm2	ENSMUSP00000111063.4	+	21424976	21507124	-1.6897	0.30999	0.0399144	0.644037	1.14293	2.83264	11.7595	1.21036	12.1604	20.0438	1.34885	1.57462	1.19355	0.758253	1.28096	1.31861
ENSMUST00000169194	chr9:21425243-21491426	+	exon sense-overlapping	ENSMUST00000165766.8	Dnm2	ENSMUSP00000128961.2	+	21424908	21507754	-1.6897	0.30999	0.0399144	0.644037	1.14293	2.83264	11.7595	1.21036	12.1604	20.0438	1.34885	1.57462	1.19355	0.758253	1.28096	1.31861
ENSMUST00000169194	chr9:21425243-21491426	+	exon sense-overlapping	ENSMUST00000172482.7	Dnm2	ENSMUSP00000133564.1	+	21425096	21506402	-1.6897	0.30999	0.0399144	0.644037	1.14293	2.83264	11.7595	1.21036	12.1604	20.0438	1.34885	1.57462	1.19355	0.758253	1.28096	1.31861
ENSMUST00000169194	chr9:21425243-21491426	+	exon sense-overlapping	ENSMUST00000091087.12	Dnm2	ENSMUSP00000088616.6	+	21424971	21507126	-1.6897	0.30999	0.0399144	0.644037	1.14293	2.83264	11.7595	1.21036	12.1604	20.0438	1.34885	1.57462	1.19355	0.758253	1.28096	1.31861
ENSMUST00000169194	chr9:21425243-21491426	+	exon sense-overlapping	ENSMUST00000173397.7	Dnm2	ENSMUSP00000134243.1	+	21424932	21507138	-1.6897	0.30999	0.0399144	0.644037	1.14293	2.83264	11.7595	1.21036	12.1604	20.0438	1.34885	1.57462	1.19355	0.758253	1.28096	1.31861
ENSMUST00000169194	chr9:21425243-21491426	+	exon sense-overlapping	ENSMUST00000172833.1	Dnm2	ENSMUSP00000133858.1	+	21476494	21499313	-1.6897	0.30999	0.0399144	0.644037	1.14293	2.83264	11.7595	1.21036	12.1604	20.0438	1.34885	1.57462	1.19355	0.758253	1.28096	1.31861
ENSMUST00000169194	chr9:21425243-21491426	+	exon sense-overlapping	ENSMUST00000174050.7	Dnm2	ENSMUSP00000134696.1	+	21425244	21507754	-1.6897	0.30999	0.0399144	0.644037	1.14293	2.83264	11.7595	1.21036	12.1604	20.0438	1.34885	1.57462	1.19355	0.758253	1.28096	1.31861
ENSMUST00000176354	chr10:57727981-57736441	+	exon sense-overlapping	ENSMUST00000177438.7	Pkib	ENSMUSP00000135774.1	+	57632124	57728150	-0.647501	0.638385	0.0214845	0.608105	0.493951	1.14145	1.71473	1.23763	1.70115	0.895476	0.679867	1.20047	0.153341	0.171578	0.185692	0.571279
ENSMUST00000176354	chr10:57727981-57736441	+	exon sense-overlapping	ENSMUST00000175852.1	Pkib	ENSMUSP00000135666.1	+	57650994	57736371	-0.647501	0.638385	0.0214845	0.608105	0.493951	1.14145	1.71473	1.23763	1.70115	0.895476	0.679867	1.20047	0.153341	0.171578	0.185692	0.571279
ENSMUST00000176354	chr10:57727981-57736441	+	exon sense-overlapping	ENSMUST00000075992.11	Pkib	ENSMUSP00000075374.5	+	57632051	57741112	-0.647501	0.638385	0.0214845	0.608105	0.493951	1.14145	1.71473	1.23763	1.70115	0.895476	0.679867	1.20047	0.153341	0.171578	0.185692	0.571279
ENSMUST00000176354	chr10:57727981-57736441	+	exon sense-overlapping	ENSMUST00000066028.12	Pkib	ENSMUSP00000067532.6	+	57650981	57737083	-0.647501	0.638385	0.0214845	0.608105	0.493951	1.14145	1.71473	1.23763	1.70115	0.895476	0.679867	1.20047	0.153341	0.171578	0.185692	0.571279
ENSMUST00000176354	chr10:57727981-57736441	+	exon sense-overlapping	ENSMUST00000177473.7	Pkib	ENSMUSP00000135835.1	+	57645885	57736370	-0.647501	0.638385	0.0214845	0.608105	0.493951	1.14145	1.71473	1.23763	1.70115	0.895476	0.679867	1.20047	0.153341	0.171578	0.185692	0.571279
ENSMUST00000176354	chr10:57727981-57736441	+	exon sense-overlapping	ENSMUST00000095668.9	Pkib	ENSMUSP00000093329.3	+	57631981	57738928	-0.647501	0.638385	0.0214845	0.608105	0.493951	1.14145	1.71473	1.23763	1.70115	0.895476	0.679867	1.20047	0.153341	0.171578	0.185692	0.571279
ENSMUST00000176354	chr10:57727981-57736441	+	exon sense-overlapping	ENSMUST00000177325.7	Pkib	ENSMUSP00000135280.1	+	57645834	57736370	-0.647501	0.638385	0.0214845	0.608105	0.493951	1.14145	1.71473	1.23763	1.70115	0.895476	0.679867	1.20047	0.153341	0.171578	0.185692	0.571279
ENSMUST00000181444	chr9:56257890-56267780	+	intronic antisense	ENSMUST00000186735.1	Peak1	ENSMUSP00000140080.1	-	56260557	56418042	-0.987436	0.504373	0.00195463	0.501667	0.840294	1.82773	3.35665	2.75627	1.80355	3.25718	1.88582	1.33124	0.610857	0.192242	0.926313	1.1332
ENSMUST00000181444	chr9:56257890-56267780	+	natural antisense	ENSMUST00000061552.14	Peak1	ENSMUSP00000109901.2	-	56205129	56418067	-0.987436	0.504373	0.00195463	0.501667	0.840294	1.82773	3.35665	2.75627	1.80355	3.25718	1.88582	1.33124	0.610857	0.192242	0.926313	1.1332
ENSMUST00000181716	chr2:93311263-93312515	-	exon sense-overlapping	ENSMUST00000111265.8	Tspan18	ENSMUSP00000106896.2	-	93201760	93334487	-0.753795	0.593042	0.00360733	0.526709	0.0868612	0.840656	0.250847	1.2871	1.21502	0.389639	1.09192	0.13901	0.005256	0.060805	0.061988	0.047562
ENSMUST00000182232	chr9:88521050-88522929	-	intergenic							-0.587165	0.66565	0.00505886	0.544501	1.27002	1.85718	1.82593	2.55366	2.35311	3.22386	3.38876	1.29757	1.21908	1.40084	2.1513	1.1148
ENSMUST00000183079	chr14:61625183-61648762	-	intergenic							-1.25977	0.417609	0.0152593	0.598661	0.0910575	1.35083	0.818095	0.098866	4.23893	1.48755	3.14601	0	0	0	0.235427	0.109783
ENSMUST00000186501	chr7:27574467-27580420	+	exon sense-overlapping	ENSMUST00000190656.1	2310022A10Rik	ENSMUSP00000141195.1	+	27565658	27580634	-0.965721	0.512023	0.0176929	0.601141	2.25173	3.21745	11.2683	6.9669	9.33853	6.47472	8.21752	5.66938	3.99981	1.1461	5.39585	4.353
ENSMUST00000186501	chr7:27574467-27580420	+	exon sense-overlapping	ENSMUST00000191126.6	2310022A10Rik	ENSMUSP00000139696.1	+	27553267	27574718	-0.965721	0.512023	0.0176929	0.601141	2.25173	3.21745	11.2683	6.9669	9.33853	6.47472	8.21752	5.66938	3.99981	1.1461	5.39585	4.353
ENSMUST00000186501	chr7:27574467-27580420	+	exon sense-overlapping	ENSMUST00000067386.13	2310022A10Rik	ENSMUSP00000066803.7	+	27553233	27582099	-0.965721	0.512023	0.0176929	0.601141	2.25173	3.21745	11.2683	6.9669	9.33853	6.47472	8.21752	5.66938	3.99981	1.1461	5.39585	4.353
ENSMUST00000186501	chr7:27574467-27580420	+	exon sense-overlapping	ENSMUST00000187960.6	2310022A10Rik	ENSMUSP00000140651.1	+	27553286	27582099	-0.965721	0.512023	0.0176929	0.601141	2.25173	3.21745	11.2683	6.9669	9.33853	6.47472	8.21752	5.66938	3.99981	1.1461	5.39585	4.353
ENSMUST00000186501	chr7:27574467-27580420	+	exon sense-overlapping	ENSMUST00000187032.1	2310022A10Rik	ENSMUSP00000139423.1	+	27560476	27582094	-0.965721	0.512023	0.0176929	0.601141	2.25173	3.21745	11.2683	6.9669	9.33853	6.47472	8.21752	5.66938	3.99981	1.1461	5.39585	4.353
ENSMUST00000188927	chr1:154003396-154006217	-	intergenic							-0.657895	0.633802	0.00367928	0.526709	1.10593	1.76382	2.57403	1.74513	2.4239	2.63108	2.70289	0.76273	0.930576	1.17854	1.00107	2.11378
ENSMUST00000190336	chr1:131294988-131333070	-	exon sense-overlapping	ENSMUST00000186543.6	Srgap2	ENSMUSP00000139405.1	-	131295218	131527347	-0.683241	0.622765	0.0461673	0.655141	0.718856	1.4021	2.91654	2.25786	0.650885	2.48203	0.757852	0.575497	0.738478	1.22493	0.431311	0.384678
ENSMUST00000190336	chr1:131294988-131333070	-	exon sense-overlapping	ENSMUST00000185596.1	Srgap2	ENSMUSP00000141140.1	-	131296641	131364064	-0.683241	0.622765	0.0461673	0.655141	0.718856	1.4021	2.91654	2.25786	0.650885	2.48203	0.757852	0.575497	0.738478	1.22493	0.431311	0.384678
ENSMUST00000190336	chr1:131294988-131333070	-	exon sense-overlapping	ENSMUST00000188770.6	Srgap2	ENSMUSP00000140910.1	-	131295221	131344547	-0.683241	0.622765	0.0461673	0.655141	0.718856	1.4021	2.91654	2.25786	0.650885	2.48203	0.757852	0.575497	0.738478	1.22493	0.431311	0.384678
ENSMUST00000190336	chr1:131294988-131333070	-	exon sense-overlapping	ENSMUST00000097588.8	Srgap2	ENSMUSP00000095195.2	-	131285251	131527347	-0.683241	0.622765	0.0461673	0.655141	0.718856	1.4021	2.91654	2.25786	0.650885	2.48203	0.757852	0.575497	0.738478	1.22493	0.431311	0.384678
ENSMUST00000190336	chr1:131294988-131333070	-	exon sense-overlapping	ENSMUST00000187042.6	Srgap2	ENSMUSP00000140927.1	-	131289358	131300453	-0.683241	0.622765	0.0461673	0.655141	0.718856	1.4021	2.91654	2.25786	0.650885	2.48203	0.757852	0.575497	0.738478	1.22493	0.431311	0.384678
ENSMUST00000190658	chr1:63470619-63545558	+	exon sense-overlapping	ENSMUST00000182642.7	Adam23	ENSMUSP00000138362.1	+	63445891	63573217	-0.683204	0.622781	0.0115619	0.590223	0.0144129	0.697617	0.403567	0.015391	1.13133	1.24432	0.645945	0	0	0	0	0.05122
ENSMUST00000190658	chr1:63470619-63545558	+	exon sense-overlapping	ENSMUST00000087374.9	Adam23	ENSMUSP00000084633.3	+	63445895	63596276	-0.683204	0.622781	0.0115619	0.590223	0.0144129	0.697617	0.403567	0.015391	1.13133	1.24432	0.645945	0	0	0	0	0.05122
ENSMUST00000190658	chr1:63470619-63545558	+	exon sense-overlapping	ENSMUST00000114107.2	Adam23	ENSMUSP00000109742.1	+	63446211	63596276	-0.683204	0.622781	0.0115619	0.590223	0.0144129	0.697617	0.403567	0.015391	1.13133	1.24432	0.645945	0	0	0	0	0.05122
ENSMUST00000190658	chr1:63470619-63545558	+	exon sense-overlapping	ENSMUST00000114103.7	Adam23	ENSMUSP00000139862.1	+	63446211	63592912	-0.683204	0.622781	0.0115619	0.590223	0.0144129	0.697617	0.403567	0.015391	1.13133	1.24432	0.645945	0	0	0	0	0.05122
ENSMUST00000193744	chr1:127978905-127984687	-	intron sense-overlapping	ENSMUST00000086614.11	Zranb3	ENSMUSP00000083806.5	-	127954184	128102462	-0.679233	0.624497	0.0134393	0.591151	1.59495	2.27419	5.5122	3.56953	3.46641	2.94312	4.05353	2.71535	1.67783	0.964209	2.5059	2.67175
ENSMUST00000193744	chr1:127978905-127984687	-	intron sense-overlapping	ENSMUST00000112538.3	Zranb3	ENSMUSP00000108157.2	-	127954670	128103001	-0.679233	0.624497	0.0134393	0.591151	1.59495	2.27419	5.5122	3.56953	3.46641	2.94312	4.05353	2.71535	1.67783	0.964209	2.5059	2.67175
ENSMUST00000195573	chr1:127406776-127407318	+	intron sense-overlapping	ENSMUST00000038361.10	Mgat5	ENSMUSP00000038359.4	+	127205018	127488336	-0.68343	0.622683	0.00836009	0.579343	0.798497	1.48193	2.27187	0.894854	1.79321	2.3389	1.94064	0.859317	0.76188	0.273591	1.21907	0.719205
ENSMUST00000195573	chr1:127406776-127407318	+	intron sense-overlapping	ENSMUST00000171405.1	Mgat5	ENSMUSP00000129166.1	+	127306762	127483704	-0.68343	0.622683	0.00836009	0.579343	0.798497	1.48193	2.27187	0.894854	1.79321	2.3389	1.94064	0.859317	0.76188	0.273591	1.21907	0.719205
ENSMUST00000197556	chr5:58047331-58049072	+	intron sense-overlapping	ENSMUST00000191837.5	Pcdh7	ENSMUSP00000142319.1	+	57717967	58133230	-0.700324	0.615434	0.00116269	0.496281	0.813046	1.51337	2.71831	1.33249	1.53575	1.87202	2.00185	0.967048	0.947198	0.429335	0.703186	0.79529
ENSMUST00000197556	chr5:58047331-58049072	+	intron sense-overlapping	ENSMUST00000094783.6	Pcdh7	ENSMUSP00000092376.4	+	57719097	58129351	-0.700324	0.615434	0.00116269	0.496281	0.813046	1.51337	2.71831	1.33249	1.53575	1.87202	2.00185	0.967048	0.947198	0.429335	0.703186	0.79529
ENSMUST00000197556	chr5:58047331-58049072	+	intron sense-overlapping	ENSMUST00000192048.1	Pcdh7	ENSMUSP00000141505.1	+	57722209	58129454	-0.700324	0.615434	0.00116269	0.496281	0.813046	1.51337	2.71831	1.33249	1.53575	1.87202	2.00185	0.967048	0.947198	0.429335	0.703186	0.79529
ENSMUST00000198654	chr5:57925620-57926975	+	intron sense-overlapping	ENSMUST00000192048.1	Pcdh7	ENSMUSP00000141505.1	+	57722209	58129454	-0.651235	0.636735	0.00231435	0.501667	0.760069	1.4113	1.89653	1.38328	1.14	1.88036	2.12831	0.591645	1.18364	0.384968	0.769972	0.635249
ENSMUST00000198654	chr5:57925620-57926975	+	intron sense-overlapping	ENSMUST00000094783.6	Pcdh7	ENSMUSP00000092376.4	+	57719097	58129351	-0.651235	0.636735	0.00231435	0.501667	0.760069	1.4113	1.89653	1.38328	1.14	1.88036	2.12831	0.591645	1.18364	0.384968	0.769972	0.635249
ENSMUST00000198654	chr5:57925620-57926975	+	intron sense-overlapping	ENSMUST00000191837.5	Pcdh7	ENSMUSP00000142319.1	+	57717967	58133230	-0.651235	0.636735	0.00231435	0.501667	0.760069	1.4113	1.89653	1.38328	1.14	1.88036	2.12831	0.591645	1.18364	0.384968	0.769972	0.635249
ENSMUST00000199734	chr5:43265157-43266368	+	intron sense-overlapping	ENSMUST00000114066.2	Cpeb2	ENSMUSP00000109700.2	+	43235038	43281210	-0.714616	0.609367	0.0020885	0.501667	2.48588	3.2005	8.3987	8.99603	5.76803	10.1328	8.27399	4.45177	4.63385	5.96502	4.85219	3.40594
ENSMUST00000199734	chr5:43265157-43266368	+	intron sense-overlapping	ENSMUST00000169035.7	Cpeb2	ENSMUSP00000125857.1	+	43233170	43289724	-0.714616	0.609367	0.0020885	0.501667	2.48588	3.2005	8.3987	8.99603	5.76803	10.1328	8.27399	4.45177	4.63385	5.96502	4.85219	3.40594
ENSMUST00000199734	chr5:43265157-43266368	+	intron sense-overlapping	ENSMUST00000114065.7	Cpeb2	ENSMUSP00000109699.2	+	43233959	43289724	-0.714616	0.609367	0.0020885	0.501667	2.48588	3.2005	8.3987	8.99603	5.76803	10.1328	8.27399	4.45177	4.63385	5.96502	4.85219	3.40594
ENSMUST00000199734	chr5:43265157-43266368	+	intron sense-overlapping	ENSMUST00000166713.7	Cpeb2	ENSMUSP00000130921.2	+	43233463	43289723	-0.714616	0.609367	0.0020885	0.501667	2.48588	3.2005	8.3987	8.99603	5.76803	10.1328	8.27399	4.45177	4.63385	5.96502	4.85219	3.40594
ENSMUST00000200182	chr3:105815540-105817356	+	intergenic							-0.604588	0.657659	0.00822132	0.579343	0.476552	1.08114	1.83895	0.613289	1.32055	0.859748	1.14468	0.549068	0.357288	0.225679	0.724687	0.173418
ENSMUST00000200979	chr5:74535979-74545452	+	exon sense-overlapping	ENSMUST00000113535.8	Fip1l1	ENSMUSP00000109163.2	+	74535481	74596145	-0.655144	0.635012	0.0290255	0.617792	0.481968	1.13711	0.645898	1.58016	1.81736	0.645887	1.61356	0	0.355075	0.205808	0.578122	1.06088
ENSMUST00000200979	chr5:74535979-74545452	+	exon sense-overlapping	ENSMUST00000113534.8	Fip1l1	ENSMUSP00000109162.2	+	74535479	74592430	-0.655144	0.635012	0.0290255	0.617792	0.481968	1.13711	0.645898	1.58016	1.81736	0.645887	1.61356	0	0.355075	0.205808	0.578122	1.06088
ENSMUST00000200979	chr5:74535979-74545452	+	exon sense-overlapping	ENSMUST00000080164.11	Fip1l1	ENSMUSP00000079059.5	+	74535449	74598790	-0.655144	0.635012	0.0290255	0.617792	0.481968	1.13711	0.645898	1.58016	1.81736	0.645887	1.61356	0	0.355075	0.205808	0.578122	1.06088
ENSMUST00000200979	chr5:74535979-74545452	+	exon sense-overlapping	ENSMUST00000120618.5	Fip1l1	ENSMUSP00000113995.2	+	74535503	74591812	-0.655144	0.635012	0.0290255	0.617792	0.481968	1.13711	0.645898	1.58016	1.81736	0.645887	1.61356	0	0.355075	0.205808	0.578122	1.06088
ENSMUST00000200979	chr5:74535979-74545452	+	exon sense-overlapping	ENSMUST00000113536.7	Fip1l1	ENSMUSP00000109164.1	+	74535471	74598800	-0.655144	0.635012	0.0290255	0.617792	0.481968	1.13711	0.645898	1.58016	1.81736	0.645887	1.61356	0	0.355075	0.205808	0.578122	1.06088
ENSMUST00000201609	chr6:35205047-35247596	+	exon sense-overlapping	ENSMUST00000043815.15	Nup205	ENSMUSP00000039656.9	+	35177430	35247596	-0.969778	0.510584	0.0314402	0.619481	0.505658	1.47544	2.0398	0.856941	0.868528	1.96828	4.31013	0.020216	1.55721	0.112613	0.691409	0.175003
ENSMUST00000201609	chr6:35205047-35247596	+	exon sense-overlapping	ENSMUST00000170234.1	Nup205	ENSMUSP00000130033.1	+	35177629	35247590	-0.969778	0.510584	0.0314402	0.619481	0.505658	1.47544	2.0398	0.856941	0.868528	1.96828	4.31013	0.020216	1.55721	0.112613	0.691409	0.175003
ENSMUST00000201609	chr6:35205047-35247596	+	exon sense-overlapping	ENSMUST00000201374.3	Nup205	ENSMUSP00000144126.1	+	35177421	35247596	-0.969778	0.510584	0.0314402	0.619481	0.505658	1.47544	2.0398	0.856941	0.868528	1.96828	4.31013	0.020216	1.55721	0.112613	0.691409	0.175003
ENSMUST00000207680	chr7:119936958-119952636	+	natural antisense	ENSMUST00000046993.3	Dnah3	ENSMUSP00000042857.3	-	119922717	120095177	-0.644097	0.639893	0.0246654	0.609453	0.324963	0.96906	1.03687	0.77108	1.43478	1.10002	0.558456	0	0.564887	0.970764	0	0
ENSMUST00000207680	chr7:119936958-119952636	+	natural antisense	ENSMUST00000209154.1	Dnah3	ENSMUSP00000146895.1	-	119922671	120090680	-0.644097	0.639893	0.0246654	0.609453	0.324963	0.96906	1.03687	0.77108	1.43478	1.10002	0.558456	0	0.564887	0.970764	0	0
ENSMUST00000207680	chr7:119936958-119952636	+	natural antisense	ENSMUST00000208701.1	Dnah3	ENSMUSP00000146733.1	-	119925979	119952157	-0.644097	0.639893	0.0246654	0.609453	0.324963	0.96906	1.03687	0.77108	1.43478	1.10002	0.558456	0	0.564887	0.970764	0	0
ENSMUST00000207680	chr7:119936958-119952636	+	exon sense-overlapping	ENSMUST00000207270.1	Lyrm1	ENSMUSP00000146648.1	+	119895861	119956963	-0.644097	0.639893	0.0246654	0.609453	0.324963	0.96906	1.03687	0.77108	1.43478	1.10002	0.558456	0	0.564887	0.970764	0	0
ENSMUST00000207680	chr7:119936958-119952636	+	exon sense-overlapping	ENSMUST00000208424.1	Lyrm1	ENSMUSP00000146841.1	+	119895867	119951814	-0.644097	0.639893	0.0246654	0.609453	0.324963	0.96906	1.03687	0.77108	1.43478	1.10002	0.558456	0	0.564887	0.970764	0	0
ENSMUST00000210022	chr13:97560000-97583994	+	intergenic							-1.05237	0.482174	0.0445599	0.652225	0.432139	1.48451	3.32471	1.94287	2.79849	0.094984	2.24092	0	0	1.3298	0.919176	0

## Sheet: up_EP-S_vs_EP-M
#log2FC >= 0.585 #p-value cut-off <= 0.05 #q-value cut-off <= 1.00 #Condition pair: up_EP-S_vs_EP-M Column A: lncRNA_id, The transcript id of lncRNA. Column B: Locus, The genomic coordinates of lncRNA. Column C: Strand, The strand of lncRNA. Column D: Relationship, The relationship between the lncRNA and neighbor protein_coding transcript. Column E: Associated_trans_id, The id of neighbor protein…
lncRNA Information			lncRNA Class							Differential Expression
lncRNA_id	Locus	Strand	Relationship	Associated_trans_id	Associated_gene_name	Associated_protein_id	Associated_gene_strand	Associated_gene_start	Associated_gene_end	log2FC	Fold_Change	p_value	q_value	EP-S_FPKM	EP-M_FPKM	EP-M11	EP-M12	EP-M13	EP-M7	EP-M9	EP-S20	EP-S6	EP-S7	EP-S8	EP-S9
ENSMUST00000032900	chr7:116031979-116032550	+	intronic antisense	ENSMUST00000166877.7	Sox6	ENSMUSP00000129512.1	-	115471344	116038744	0.703447	1.62839	0.00242919	0.505274	2.14659	1.44314	1.91994	1.28513	1.46259	2.06738	1.9492	3.80763	4.19522	2.21121	2.95953	4.35913
ENSMUST00000122974	chr14:21031534-21034780	-	exon sense-overlapping	ENSMUST00000154460.7	Ap3m1	ENSMUSP00000117346.1	-	21031442	21052450	0.599275	1.51496	0.000377264	0.462204	0.649058	0.0497827	0	0	0	0	0.188312	0.313497	0.819457	0.410774	0.614572	0.741982
ENSMUST00000122974	chr14:21031534-21034780	-	natural antisense	ENSMUST00000022369.7	Vcl	ENSMUSP00000022369.7	+	20929433	21033673	0.599275	1.51496	0.000377264	0.462204	0.649058	0.0497827	0	0	0	0	0.188312	0.313497	0.819457	0.410774	0.614572	0.741982
ENSMUST00000123426	chr2:90894638-90902686	-	exon sense-overlapping	ENSMUST00000005647.3	Ndufs3	ENSMUSP00000005647.3	-	90894636	90904827	0.642798	1.56135	0.023253	0.60817	2.52152	1.87872	3.79061	3.83336	1.07027	3.07311	2.4448	4.3009	4.53623	4.70069	5.31076	4.91143
ENSMUST00000124445	chr1:30946167-30949309	-	exon sense-overlapping	ENSMUST00000076587.4	Ptp4a1	ENSMUSP00000110861.1	-	30941580	30949757	0.672808	1.59417	0.0066983	0.556256	2.73668	2.06387	2.1591	3.13502	4.87663	2.47663	3.78749	7.43045	5.4026	5.53002	4.67262	5.57973
ENSMUST00000124445	chr1:30946167-30949309	-	exon sense-overlapping	ENSMUST00000202889.1	Ptp4a1	ENSMUSP00000143884.1	-	30946544	30949587	0.672808	1.59417	0.0066983	0.556256	2.73668	2.06387	2.1591	3.13502	4.87663	2.47663	3.78749	7.43045	5.4026	5.53002	4.67262	5.57973
ENSMUST00000124445	chr1:30946167-30949309	-	exon sense-overlapping	ENSMUST00000027232.13	Ptp4a1	ENSMUSP00000027232.7	-	30940302	30949770	0.672808	1.59417	0.0066983	0.556256	2.73668	2.06387	2.1591	3.13502	4.87663	2.47663	3.78749	7.43045	5.4026	5.53002	4.67262	5.57973
ENSMUST00000125072	chr11:102219153-102230146	-	exon sense-overlapping	ENSMUST00000156337.1	Hdac5	ENSMUSP00000116646.1	-	102205887	102230142	0.611015	1.52733	0.0183985	0.601141	0.976717	0.365702	0	0.422926	0.503418	0	0.660254	0.939775	0.807694	1.10899	0.488986	1.6808
ENSMUST00000125072	chr11:102219153-102230146	-	exon sense-overlapping	ENSMUST00000008999.11	Hdac5	ENSMUSP00000008999.5	-	102195744	102230124	0.611015	1.52733	0.0183985	0.601141	0.976717	0.365702	0	0.422926	0.503418	0	0.660254	0.939775	0.807694	1.10899	0.488986	1.6808
ENSMUST00000125072	chr11:102219153-102230146	-	exon sense-overlapping	ENSMUST00000107150.7	Hdac5	ENSMUSP00000102768.1	-	102195751	102230136	0.611015	1.52733	0.0183985	0.601141	0.976717	0.365702	0	0.422926	0.503418	0	0.660254	0.939775	0.807694	1.10899	0.488986	1.6808
ENSMUST00000125072	chr11:102219153-102230146	-	exon sense-overlapping	ENSMUST00000107152.8	Hdac5	ENSMUSP00000102770.2	-	102195751	102230166	0.611015	1.52733	0.0183985	0.601141	0.976717	0.365702	0	0.422926	0.503418	0	0.660254	0.939775	0.807694	1.10899	0.488986	1.6808
ENSMUST00000125072	chr11:102219153-102230146	-	exon sense-overlapping	ENSMUST00000107151.8	Hdac5	ENSMUSP00000102769.2	-	102194432	102230166	0.611015	1.52733	0.0183985	0.601141	0.976717	0.365702	0	0.422926	0.503418	0	0.660254	0.939775	0.807694	1.10899	0.488986	1.6808
ENSMUST00000126458	chr4:118621226-118625618	+	exon sense-overlapping	ENSMUST00000030501.14	Ebna1bp2	ENSMUSP00000030501.8	+	118620799	118627776	0.771485	1.70703	0.00148066	0.501667	1.44135	0.669868	0.478609	0.772768	0.751087	0.240886	0.789401	2.37317	1.81521	1.96032	0.988355	1.64285
ENSMUST00000126458	chr4:118621226-118625618	+	exon sense-overlapping	ENSMUST00000147373.1	Ebna1bp2	ENSMUSP00000114372.1	+	118621160	118624192	0.771485	1.70703	0.00148066	0.501667	1.44135	0.669868	0.478609	0.772768	0.751087	0.240886	0.789401	2.37317	1.81521	1.96032	0.988355	1.64285
ENSMUST00000129027	chr10:80412627-80415487	-	exon sense-overlapping	ENSMUST00000105339.7	Tcf3	ENSMUSP00000100976.1	-	80410054	80431082	0.658595	1.57854	0.0352695	0.630822	2.26427	1.60568	2.19533	1.49629	2.87551	0.921245	3.39603	3.44015	3.22266	6.18637	3.41701	3.29978
ENSMUST00000129027	chr10:80412627-80415487	-	exon sense-overlapping	ENSMUST00000020377.12	Tcf3	ENSMUSP00000020377.6	-	80409608	80433621	0.658595	1.57854	0.0352695	0.630822	2.26427	1.60568	2.19533	1.49629	2.87551	0.921245	3.39603	3.44015	3.22266	6.18637	3.41701	3.29978
ENSMUST00000129027	chr10:80412627-80415487	-	exon sense-overlapping	ENSMUST00000105342.7	Tcf3	ENSMUSP00000100979.1	-	80409547	80433643	0.658595	1.57854	0.0352695	0.630822	2.26427	1.60568	2.19533	1.49629	2.87551	0.921245	3.39603	3.44015	3.22266	6.18637	3.41701	3.29978
ENSMUST00000129027	chr10:80412627-80415487	-	exon sense-overlapping	ENSMUST00000020379.12	Tcf3	ENSMUSP00000020379.6	-	80409626	80433635	0.658595	1.57854	0.0352695	0.630822	2.26427	1.60568	2.19533	1.49629	2.87551	0.921245	3.39603	3.44015	3.22266	6.18637	3.41701	3.29978
ENSMUST00000129027	chr10:80412627-80415487	-	exon sense-overlapping	ENSMUST00000105344.7	Tcf3	ENSMUSP00000100981.1	-	80409514	80433637	0.658595	1.57854	0.0352695	0.630822	2.26427	1.60568	2.19533	1.49629	2.87551	0.921245	3.39603	3.44015	3.22266	6.18637	3.41701	3.29978
ENSMUST00000129027	chr10:80412627-80415487	-	exon sense-overlapping	ENSMUST00000105345.9	Tcf3	ENSMUSP00000100982.3	-	80409514	80433647	0.658595	1.57854	0.0352695	0.630822	2.26427	1.60568	2.19533	1.49629	2.87551	0.921245	3.39603	3.44015	3.22266	6.18637	3.41701	3.29978
ENSMUST00000129027	chr10:80412627-80415487	-	exon sense-overlapping	ENSMUST00000156990.7	Tcf3	ENSMUSP00000121172.1	-	80410054	80430985	0.658595	1.57854	0.0352695	0.630822	2.26427	1.60568	2.19533	1.49629	2.87551	0.921245	3.39603	3.44015	3.22266	6.18637	3.41701	3.29978
ENSMUST00000129027	chr10:80412627-80415487	-	exon sense-overlapping	ENSMUST00000105340.7	Tcf3	ENSMUSP00000100977.1	-	80409626	80433635	0.658595	1.57854	0.0352695	0.630822	2.26427	1.60568	2.19533	1.49629	2.87551	0.921245	3.39603	3.44015	3.22266	6.18637	3.41701	3.29978
ENSMUST00000129027	chr10:80412627-80415487	-	exon sense-overlapping	ENSMUST00000105341.7	Tcf3	ENSMUSP00000100978.1	-	80409620	80431012	0.658595	1.57854	0.0352695	0.630822	2.26427	1.60568	2.19533	1.49629	2.87551	0.921245	3.39603	3.44015	3.22266	6.18637	3.41701	3.29978
ENSMUST00000129027	chr10:80412627-80415487	-	exon sense-overlapping	ENSMUST00000105346.9	Tcf3	ENSMUSP00000100983.3	-	80409608	80433621	0.658595	1.57854	0.0352695	0.630822	2.26427	1.60568	2.19533	1.49629	2.87551	0.921245	3.39603	3.44015	3.22266	6.18637	3.41701	3.29978
ENSMUST00000129027	chr10:80412627-80415487	-	exon sense-overlapping	ENSMUST00000105343.7	Tcf3	ENSMUSP00000100980.1	-	80409547	80433647	0.658595	1.57854	0.0352695	0.630822	2.26427	1.60568	2.19533	1.49629	2.87551	0.921245	3.39603	3.44015	3.22266	6.18637	3.41701	3.29978
ENSMUST00000135817	chr7:16784738-16793706	+	exon sense-overlapping	ENSMUST00000108496.8	Slc1a5	ENSMUSP00000104136.2	+	16781340	16798274	0.759721	1.69316	8.18076e-05	0.269539	2.41268	1.65296	2.13105	1.92538	2.8536	1.63316	2.3093	4.12363	4.69014	4.1135	3.91306	4.84353
ENSMUST00000136648	chr1:43445751-43462194	+	exon sense-overlapping	ENSMUST00000086421.8	Nck2	ENSMUSP00000083611.5	+	43445751	43570515	0.646894	1.56579	0.0309894	0.618833	0.806893	0.159998	0.035081	0.276103	0.222238	0.078464	0	0.361588	1.35411	1.67504	0.103362	0.732098
ENSMUST00000136648	chr1:43445751-43462194	+	intron sense-overlapping	ENSMUST00000187435.6	Nck2	ENSMUSP00000140338.1	+	43444579	43533632	0.646894	1.56579	0.0309894	0.618833	0.806893	0.159998	0.035081	0.276103	0.222238	0.078464	0	0.361588	1.35411	1.67504	0.103362	0.732098
ENSMUST00000136700	chr16:20286930-20301329	-	exon sense-overlapping	ENSMUST00000048642.14	Parl	ENSMUSP00000045361.8	-	20279820	20302387	0.754824	1.68743	0.0183337	0.601141	1.05544	0.30062	0.109561	0.019105	0	0.141996	1.19505	1.75517	0.769203	0.813843	1.538	0.728161
ENSMUST00000137948	chr18:12252365-12271697	-	exon sense-overlapping	ENSMUST00000118525.7	Ankrd29	ENSMUSP00000114028.1	-	12252362	12305711	1.02149	2.03001	0.0242472	0.608792	1.197	0.175507	0	0.823411	0.002102	0.005468	0	0.003934	1.90033	1.90467	2.64001	1.05735
ENSMUST00000137948	chr18:12252365-12271697	-	exon sense-overlapping	ENSMUST00000122408.7	Ankrd29	ENSMUSP00000112888.1	-	12254582	12305638	1.02149	2.03001	0.0242472	0.608792	1.197	0.175507	0	0.823411	0.002102	0.005468	0	0.003934	1.90033	1.90467	2.64001	1.05735
ENSMUST00000138589	chr5:144857276-144859343	+	exon sense-overlapping	ENSMUST00000038980.12	Trrap	ENSMUSP00000042544.6	+	144771089	144859751	0.889935	1.85309	0.00168957	0.501667	2.01891	1.12898	1.45282	0.57738	0.879186	1.77737	1.47785	3.29935	2.08305	3.90551	2.67141	3.58001
ENSMUST00000138589	chr5:144857276-144859343	+	exon sense-overlapping	ENSMUST00000132925.1	Trrap	ENSMUSP00000122021.1	+	144785525	144859776	0.889935	1.85309	0.00168957	0.501667	2.01891	1.12898	1.45282	0.57738	0.879186	1.77737	1.47785	3.29935	2.08305	3.90551	2.67141	3.58001
ENSMUST00000138589	chr5:144857276-144859343	+	exon sense-overlapping	ENSMUST00000094120.8	Trrap	ENSMUSP00000091668.2	+	144771089	144859776	0.889935	1.85309	0.00168957	0.501667	2.01891	1.12898	1.45282	0.57738	0.879186	1.77737	1.47785	3.29935	2.08305	3.90551	2.67141	3.58001
ENSMUST00000138589	chr5:144857276-144859343	+	exon sense-overlapping	ENSMUST00000100467.9	Trrap	ENSMUSP00000098035.3	+	144768794	144859778	0.889935	1.85309	0.00168957	0.501667	2.01891	1.12898	1.45282	0.57738	0.879186	1.77737	1.47785	3.29935	2.08305	3.90551	2.67141	3.58001
ENSMUST00000140351	chr9:68653786-68664967	+	exon sense-overlapping	ENSMUST00000034766.13	Rora	ENSMUSP00000034766.6	+	68653786	69388246	0.968416	1.95669	0.0249046	0.610505	1.74954	0.781119	0	1.62068	1.84625	1.00916	0	1.94474	2.04429	3.6732	2.05927	2.35389
ENSMUST00000140405	chr19:4125989-4131727	+	bidirectional	ENSMUST00000117831.7	Aip	ENSMUSP00000113807.1	-	4114446	4125858	0.688244	1.61132	0.0479863	0.657323	1.98622	1.29797	0.377789	2.62027	1.55921	1.29977	2.06148	2.52815	3.77628	3.75684	1.57796	3.72416
ENSMUST00000140405	chr19:4125989-4131727	+	bidirectional	ENSMUST00000121402.1	Aip	ENSMUSP00000114096.1	-	4115447	4125848	0.688244	1.61132	0.0479863	0.657323	1.98622	1.29797	0.377789	2.62027	1.55921	1.29977	2.06148	2.52815	3.77628	3.75684	1.57796	3.72416
ENSMUST00000143678	chr2:26911006-26913318	+	exon sense-overlapping	ENSMUST00000102898.4	Rpl7a	ENSMUSP00000099962.4	+	26910764	26913318	1.97805	3.93961	0.00801822	0.579343	4.3875	2.40945	6.54919	4.20211	3.48608	3.45852	4.38815	19.2649	19.934	43.8226	38.8003	4.3072
ENSMUST00000147511	chr4:144974926-144983961	-	exon sense-overlapping	ENSMUST00000036579.13	Vps13d	ENSMUSP00000043240.7	-	144972622	145195005	0.668174	1.58906	0.0467649	0.655141	1.12032	0.45215	0.0236	1.04841	1.13044	0.030821	0.040769	1.03928	0.888335	0.89377	1.11875	2.14263
ENSMUST00000147511	chr4:144974926-144983961	-	exon sense-overlapping	ENSMUST00000185113.1	Vps13d	ENSMUSP00000138946.1	-	144974596	145155486	0.668174	1.58906	0.0467649	0.655141	1.12032	0.45215	0.0236	1.04841	1.13044	0.030821	0.040769	1.03928	0.888335	0.89377	1.11875	2.14263
ENSMUST00000147511	chr4:144974926-144983961	-	exon sense-overlapping	ENSMUST00000020441.12	Vps13d	ENSMUSP00000020441.6	-	144972626	145190666	0.668174	1.58906	0.0467649	0.655141	1.12032	0.45215	0.0236	1.04841	1.13044	0.030821	0.040769	1.03928	0.888335	0.89377	1.11875	2.14263
ENSMUST00000147651	chr6:38533502-38539448	+	exon sense-overlapping	ENSMUST00000019833.4	1110001J03Rik	ENSMUSP00000019833.4	+	38534823	38539449	1.45281	2.7374	0.00951255	0.580438	1.49173	0.0389257	0.05519	0	0.000762	0.083746	0	2.11003	0.160512	6.3608	1.87676	1.30165
ENSMUST00000148807	chr19:4125979-4131735	+	bidirectional	ENSMUST00000121402.1	Aip	ENSMUSP00000114096.1	-	4115447	4125848	0.636103	1.55413	0.0364152	0.634994	1.06262	0.426518	0.325051	0.018345	0.390427	0.527031	0.530559	1.15693	2.79484	0.571882	0.873596	0.649223
ENSMUST00000148807	chr19:4125979-4131735	+	bidirectional	ENSMUST00000117831.7	Aip	ENSMUSP00000113807.1	-	4114446	4125858	0.636103	1.55413	0.0364152	0.634994	1.06262	0.426518	0.325051	0.018345	0.390427	0.527031	0.530559	1.15693	2.79484	0.571882	0.873596	0.649223
ENSMUST00000150493	chr7:28901915-28907686	-	exon sense-overlapping	ENSMUST00000127210.7	Actn4	ENSMUSP00000115436.1	-	28898620	28962223	0.645289	1.56405	0.0412359	0.646285	2.19749	1.5522	1.43733	1.66187	3.07881	0.857504	3.41294	4.88856	4.0807	2.98016	3.71154	2.61868
ENSMUST00000150493	chr7:28901915-28907686	-	exon sense-overlapping	ENSMUST00000068045.13	Actn4	ENSMUSP00000066068.7	-	28893248	28962340	0.645289	1.56405	0.0412359	0.646285	2.19749	1.5522	1.43733	1.66187	3.07881	0.857504	3.41294	4.88856	4.0807	2.98016	3.71154	2.61868
ENSMUST00000150493	chr7:28901915-28907686	-	exon sense-overlapping	ENSMUST00000140622.7	Actn4	ENSMUSP00000123210.1	-	28907014	28919221	0.645289	1.56405	0.0412359	0.646285	2.19749	1.5522	1.43733	1.66187	3.07881	0.857504	3.41294	4.88856	4.0807	2.98016	3.71154	2.61868
ENSMUST00000151699	chr6:88724470-88726041	+	exon sense-overlapping	ENSMUST00000113581.7	Mgll	ENSMUSP00000109211.1	+	88724494	88825990	0.786046	1.72434	0.0417341	0.647851	3.31459	2.52854	4.27637	3.34772	8.798	2.91448	6.26826	7.03325	13.4231	5.53627	12.1893	8.76013
ENSMUST00000151699	chr6:88724470-88726041	+	exon sense-overlapping	ENSMUST00000150180.3	Mgll	ENSMUSP00000145068.1	+	88724596	88766708	0.786046	1.72434	0.0417341	0.647851	3.31459	2.52854	4.27637	3.34772	8.798	2.91448	6.26826	7.03325	13.4231	5.53627	12.1893	8.76013
ENSMUST00000151699	chr6:88724470-88726041	+	exon sense-overlapping	ENSMUST00000113585.8	Mgll	ENSMUSP00000109215.2	+	88724412	88828360	0.786046	1.72434	0.0417341	0.647851	3.31459	2.52854	4.27637	3.34772	8.798	2.91448	6.26826	7.03325	13.4231	5.53627	12.1893	8.76013
ENSMUST00000151699	chr6:88724470-88726041	+	exon sense-overlapping	ENSMUST00000113582.7	Mgll	ENSMUSP00000109212.1	+	88724470	88825911	0.786046	1.72434	0.0417341	0.647851	3.31459	2.52854	4.27637	3.34772	8.798	2.91448	6.26826	7.03325	13.4231	5.53627	12.1893	8.76013
ENSMUST00000151699	chr6:88724470-88726041	+	exon sense-overlapping	ENSMUST00000163271.7	Mgll	ENSMUSP00000127374.1	+	88724704	88828360	0.786046	1.72434	0.0417341	0.647851	3.31459	2.52854	4.27637	3.34772	8.798	2.91448	6.26826	7.03325	13.4231	5.53627	12.1893	8.76013
ENSMUST00000151699	chr6:88724470-88726041	+	exon sense-overlapping	ENSMUST00000089449.4	Mgll	ENSMUSP00000086872.2	+	88724828	88828360	0.786046	1.72434	0.0417341	0.647851	3.31459	2.52854	4.27637	3.34772	8.798	2.91448	6.26826	7.03325	13.4231	5.53627	12.1893	8.76013
ENSMUST00000151800	chr6:31220357-31337392	+	intergenic							0.880585	1.84112	0.018156	0.601141	1.31496	0.434376	0.215348	0.078237	0.097044	0.306285	1.39952	1.63549	0.684588	1.06422	2.98351	1.61117
ENSMUST00000153619	chr4:152117971-152119323	+	exon sense-overlapping	ENSMUST00000035275.7	Tnfrsf25	ENSMUSP00000047823.7	+	152116343	152120111	0.744979	1.67595	0.00041176	0.462204	0.829073	0.0840939	0	0	0	0.087301	0.230904	1.09039	1.20272	0.474928	0.638585	0.590205
ENSMUST00000153619	chr4:152117971-152119323	+	exon sense-overlapping	ENSMUST00000025706.9	Tnfrsf25	ENSMUSP00000025706.3	+	152115934	152120119	0.744979	1.67595	0.00041176	0.462204	0.829073	0.0840939	0	0	0	0.087301	0.230904	1.09039	1.20272	0.474928	0.638585	0.590205
ENSMUST00000154343	chr2:136502181-136514214	+	intergenic							0.822294	1.76822	0.0115672	0.590223	3.5109	2.68861	7.98197	3.51234	5.46314	5.09816	5.97183	10.2631	15.1828	7.0562	13.662	7.94144
ENSMUST00000157013	chr16:17152318-17160075	-	exon sense-overlapping	ENSMUST00000090192.11	Ube2l3	ENSMUSP00000087658.5	-	17152015	17201492	0.590836	1.50612	0.0399183	0.644037	0.86197	0.271134	0	0	0.892634	0.352167	0	1.00179	0.926453	1.37719	0.756356	0.231802
ENSMUST00000157013	chr16:17152318-17160075	-	natural antisense	ENSMUST00000115706.7	Ydjc	ENSMUSP00000111371.1	+	17146937	17160701	0.590836	1.50612	0.0399183	0.644037	0.86197	0.271134	0	0	0.892634	0.352167	0	1.00179	0.926453	1.37719	0.756356	0.231802
ENSMUST00000157013	chr16:17152318-17160075	-	exon sense-overlapping	ENSMUST00000115700.1	Ube2l3	ENSMUSP00000111364.1	-	17153310	17201494	0.590836	1.50612	0.0399183	0.644037	0.86197	0.271134	0	0	0.892634	0.352167	0	1.00179	0.926453	1.37719	0.756356	0.231802
ENSMUST00000157013	chr16:17152318-17160075	-	exon sense-overlapping	ENSMUST00000115699.7	Ube2l3	ENSMUSP00000111363.1	-	17152013	17202649	0.590836	1.50612	0.0399183	0.644037	0.86197	0.271134	0	0	0.892634	0.352167	0	1.00179	0.926453	1.37719	0.756356	0.231802
ENSMUST00000164027	chr10:60346905-60358216	+	intronic antisense	ENSMUST00000105461.9	Cdh23	ENSMUSP00000101101.3	-	60302750	60696490	0.602163	1.51799	0.0170929	0.601141	1.39335	0.79119	0.997337	0.798291	0.793595	0.217187	0.979097	2.00137	1.2797	0.899632	1.78061	2.46098
ENSMUST00000164027	chr10:60346905-60358216	+	intronic antisense	ENSMUST00000105463.8	Cdh23	ENSMUSP00000101103.2	-	60302750	60696490	0.602163	1.51799	0.0170929	0.601141	1.39335	0.79119	0.997337	0.798291	0.793595	0.217187	0.979097	2.00137	1.2797	0.899632	1.78061	2.46098
ENSMUST00000164027	chr10:60346905-60358216	+	exon sense-overlapping	ENSMUST00000105460.7	Vsir	ENSMUSP00000101100.1	+	60346851	60372684	0.602163	1.51799	0.0170929	0.601141	1.39335	0.79119	0.997337	0.798291	0.793595	0.217187	0.979097	2.00137	1.2797	0.899632	1.78061	2.46098
ENSMUST00000164027	chr10:60346905-60358216	+	intronic antisense	ENSMUST00000105462.7	Cdh23	ENSMUSP00000101102.1	-	60302748	60657333	0.602163	1.51799	0.0170929	0.601141	1.39335	0.79119	0.997337	0.798291	0.793595	0.217187	0.979097	2.00137	1.2797	0.899632	1.78061	2.46098
ENSMUST00000164027	chr10:60346905-60358216	+	intronic antisense	ENSMUST00000105464.8	Cdh23	ENSMUSP00000101104.2	-	60302750	60696490	0.602163	1.51799	0.0170929	0.601141	1.39335	0.79119	0.997337	0.798291	0.793595	0.217187	0.979097	2.00137	1.2797	0.899632	1.78061	2.46098
ENSMUST00000164027	chr10:60346905-60358216	+	intronic antisense	ENSMUST00000073242.10	Cdh23	ENSMUSP00000072973.4	-	60302748	60657333	0.602163	1.51799	0.0170929	0.601141	1.39335	0.79119	0.997337	0.798291	0.793595	0.217187	0.979097	2.00137	1.2797	0.899632	1.78061	2.46098
ENSMUST00000164027	chr10:60346905-60358216	+	exon sense-overlapping	ENSMUST00000170507.7	Vsir	ENSMUSP00000127569.1	+	60347012	60367768	0.602163	1.51799	0.0170929	0.601141	1.39335	0.79119	0.997337	0.798291	0.793595	0.217187	0.979097	2.00137	1.2797	0.899632	1.78061	2.46098
ENSMUST00000164027	chr10:60346905-60358216	+	exon sense-overlapping	ENSMUST00000020301.13	Vsir	ENSMUSP00000020301.7	+	60346851	60372684	0.602163	1.51799	0.0170929	0.601141	1.39335	0.79119	0.997337	0.798291	0.793595	0.217187	0.979097	2.00137	1.2797	0.899632	1.78061	2.46098
ENSMUST00000164027	chr10:60346905-60358216	+	exon sense-overlapping	ENSMUST00000105459.1	Vsir	ENSMUSP00000101099.1	+	60349323	60369293	0.602163	1.51799	0.0170929	0.601141	1.39335	0.79119	0.997337	0.798291	0.793595	0.217187	0.979097	2.00137	1.2797	0.899632	1.78061	2.46098
ENSMUST00000174321	chr17:33908294-33909317	-	bidirectional	ENSMUST00000170075.8	Daxx	ENSMUSP00000128504.2	+	33909601	33915582	0.664159	1.58464	0.00479797	0.544501	2.08052	1.41636	1.84653	2.01739	1.50924	1.95014	1.13059	4.56045	2.99504	2.16703	2.83568	4.01609
ENSMUST00000174321	chr17:33908294-33909317	-	bidirectional	ENSMUST00000079421.13	Daxx	ENSMUSP00000078390.7	+	33909445	33915589	0.664159	1.58464	0.00479797	0.544501	2.08052	1.41636	1.84653	2.01739	1.50924	1.95014	1.13059	4.56045	2.99504	2.16703	2.83568	4.01609
ENSMUST00000174321	chr17:33908294-33909317	-	bidirectional	ENSMUST00000173626.7	Daxx	ENSMUSP00000133303.1	+	33909498	33911512	0.664159	1.58464	0.00479797	0.544501	2.08052	1.41636	1.84653	2.01739	1.50924	1.95014	1.13059	4.56045	2.99504	2.16703	2.83568	4.01609
ENSMUST00000174321	chr17:33908294-33909317	-	bidirectional	ENSMUST00000173028.7	Daxx	ENSMUSP00000133319.1	+	33909414	33911423	0.664159	1.58464	0.00479797	0.544501	2.08052	1.41636	1.84653	2.01739	1.50924	1.95014	1.13059	4.56045	2.99504	2.16703	2.83568	4.01609
ENSMUST00000174321	chr17:33908294-33909317	-	bidirectional	ENSMUST00000174541.7	Daxx	ENSMUSP00000133552.1	+	33909515	33915518	0.664159	1.58464	0.00479797	0.544501	2.08052	1.41636	1.84653	2.01739	1.50924	1.95014	1.13059	4.56045	2.99504	2.16703	2.83568	4.01609
ENSMUST00000181614	chr10:22144302-22148823	-	exon sense-overlapping	ENSMUST00000179054.7	E030030I06Rik	ENSMUSP00000136352.1	-	22113050	22149270	0.638288	1.55648	0.00416085	0.540934	0.95225	0.313962	0.157219	0.526804	0.051295	0.173098	0.362392	0.628183	1.02319	1.63593	0.606144	0.944561
ENSMUST00000181614	chr10:22144302-22148823	-	exon sense-overlapping	ENSMUST00000069372.6	E030030I06Rik	ENSMUSP00000065555.6	-	22144421	22149270	0.638288	1.55648	0.00416085	0.540934	0.95225	0.313962	0.157219	0.526804	0.051295	0.173098	0.362392	0.628183	1.02319	1.63593	0.606144	0.944561
ENSMUST00000181930	chr3:9403080-9413903	+	intergenic							0.653698	1.5732	0.0462806	0.655141	0.866287	0.212589	0.030242	0	0.509198	0	0.34367	1.09223	1.51933	0.567717	0	1.43629
ENSMUST00000182900	chr9:88521148-88522053	-	intergenic							0.732184	1.66115	0.00737757	0.579343	1.5078	0.775614	1.22927	0.505906	0.415885	1.14361	0.443049	1.40784	1.62145	2.26869	1.29491	2.92785
ENSMUST00000185211	chr19:25671134-25672239	-	bidirectional	ENSMUST00000053068.5	Dmrt2	ENSMUSP00000059654.5	+	25672420	25679010	0.787384	1.72594	0.0143351	0.598661	2.68412	1.89673	1.79091	1.41237	4.33625	3.55468	3.37505	4.16473	6.53193	4.48562	5.41827	7.00572
ENSMUST00000186565	chr1:15805657-15822015	+	exon sense-overlapping	ENSMUST00000027057.7	Terf1	ENSMUSP00000027057.7	+	15805664	15843470	1.34845	2.54638	0.00468959	0.544501	2.00664	0.658188	8.5e-05	0	0.613756	0.72708	2.51143	3.29548	3.53759	3.64263	2.29494	2.51432
ENSMUST00000186565	chr1:15805657-15822015	+	exon sense-overlapping	ENSMUST00000188371.6	Terf1	ENSMUSP00000140744.1	+	15805646	15844052	1.34845	2.54638	0.00468959	0.544501	2.00664	0.658188	8.5e-05	0	0.613756	0.72708	2.51143	3.29548	3.53759	3.64263	2.29494	2.51432
ENSMUST00000188711	chr19:25671172-25672222	-	bidirectional	ENSMUST00000053068.5	Dmrt2	ENSMUSP00000059654.5	+	25672420	25679010	0.770756	1.70616	0.01942	0.60327	2.87004	2.09928	2.61016	2.30252	2.82437	3.95754	5.39052	5.287	9.1838	3.68198	8.07573	6.67666
ENSMUST00000192833	chr17:39843013-39846341	+	intergenic							0.632226	1.54995	0.00961773	0.580438	10.6579	10.0257	809.255	1004.04	1219.6	965.531	1280.11	1371.31	1512.64	2297.05	1328.93	1733.25
ENSMUST00000202583	chr5:149641610-149647790	+	intergenic							0.614091	1.53059	0.000139772	0.269539	0.614091	0	0	0	0	0	0	0.417553	0.616256	0.443484	0.33432	0.903608
ENSMUST00000203422	chr6:124913688-124914674	-	exon sense-overlapping	ENSMUST00000032216.6	Ptms	ENSMUSP00000032216.6	-	124913681	124917946	0.980851	1.97363	0.0193612	0.60327	2.9978	2.01695	2.30861	3.73739	3.31386	1.90421	4.53009	7.23271	5.32597	14.0189	3.48604	8.26766
