# Supplementary material for: Salvianolic acid B plays an anti-obesity role in high fat diet-induced obese mice by regulating the expression of mRNA, circRNA, and lncRNA
Source: PeerJ. 2019 Feb 28;7:e6506. doi: 10.7717/peerj.6506 (PMC6397762; doi:10.7717/peerj.6506)
Supplement: Supplemental Information 4 [file peerj-07-6506-s004.xlsx]

## Sheet: Sheet1
mRNA Name	lncRNA Name	score	Correlation	P Value	FDR
S100a8	ENSMUST00000169194	0.930235	+	9.52158e-05	0.0114259
Hpgds	ENSMUST00000140351	-0.908126	-	0.000278639	0.0131518
Ms4a14	ENSMUST00000140351	-0.934377	-	7.49161e-05	0.0114259
Cd300ld3	ENSMUST00000140351	-0.919959	-	0.00016289	0.0120749
Lum	ENSMUST00000140351	-0.912033	-	0.000235315	0.0131518
Glipr1	ENSMUST00000140351	-0.918549	-	0.000174371	0.0120749
Cd300ld5	ENSMUST00000140351	-0.92617	-	0.000118827	0.0118827
Rgs18	ENSMUST00000140351	-0.958866	-	1.19169e-05	0.00715013
Cd300ld4	ENSMUST00000140351	-0.930948	-	9.14626e-05	0.0114259
Fgd4	ENSMUST00000140351	-0.942068	-	4.59347e-05	0.0114259
Frmd4b	ENSMUST00000140351	-0.907595	-	0.000284955	0.0131518
Fgl2	ENSMUST00000169194	0.907672	+	0.000284029	0.0131518
Osbpl8	ENSMUST00000140351	-0.917751	-	0.000181123	0.0120749
