# Supplementary material for: Salvianolic acid B plays an anti-obesity role in high fat diet-induced obese mice by regulating the expression of mRNA, circRNA, and lncRNA
Source: PeerJ. 2019 Feb 28;7:e6506. doi: 10.7717/peerj.6506 (PMC6397762; doi:10.7717/peerj.6506)
Supplement: Supplemental Information 5 [file peerj-07-6506-s005.xlsx]

## Sheet: up
Column "ID" stands for the ID of gene ontology term
Column "Term" stands for the name of gene ontology term
Column "Ontology" stands for the class of ontology
Column "Count" stands for the number of DE genes associated with the term
Column "Size" stands for the number of background population genes associated with the term
Column "numInt" stands for the total number of DE genes
Column "numTotal" stands for the total number of background population genes
Column "p_value" stands for the fisher exact test value of the term
Column "fdr" stands for the false discovery rate of the term, using Benjamini & Hochberg (1995) method
Column "Enrichment_Score" stands for the Enrichment Score value of the term, it equals (-log10(Pvalue))
Column "Fold_Enrichment" stands for the Fold Enrichment value of the term, it equals (Count/Size)/(numInt/numTotal)
Column "GeneRatio" stands for the Gene Ratio value genes associated with the term, it equals (Count/numInt)
Column "Genes" stands for the DE genes associated with the term
ID	Term	Ontology	Count	Size	numInt	numTotal	p_value	fdr	Enrichment_Score	Fold_Enrichment	GeneRatio	Genes
GO:0050873	brown_fat_cell_differentiation	Biological Process	2	35	16	23833	0.000248186	0.0110014	3.60522	85.1179	0.125	Adig//Slc2a4
GO:0006694	steroid_biosynthetic_process	Biological Process	2	58	16	23833	0.000683318	0.0110014	3.16538	51.3642	0.125	Fdx1//Tspo
GO:0006869	lipid_transport	Biological Process	2	99	16	23833	0.0019734	0.0147296	2.70478	30.0922	0.125	Slc27a1//Tspo
GO:0006629	lipid_metabolic_process	Biological Process	3	457	16	23833	0.00325694	0.0166253	2.48719	9.77831	0.1875	Aacs//Fdx1//Slc27a1
GO:0006631	fatty_acid_metabolic_process	Biological Process	2	155	16	23833	0.00475008	0.0166253	2.3233	19.2202	0.125	Aacs//Slc27a1
GO:0006810	transport	Biological Process	5	1810	16	23833	0.00539787	0.0167127	2.26778	4.11481	0.3125	Fdx1//Slc1a5//Slc27a1//Slc2a4//Tspo
GO:0005975	carbohydrate_metabolic_process	Biological Process	2	184	16	23833	0.0066252	0.0185827	2.1788	16.1909	0.125	Chst1//Klb
GO:0043065	positive_regulation_of_apoptotic_process	Biological Process	2	322	16	23833	0.0192719	0.0334086	1.71508	9.25194	0.125	Rarg//Tspo
GO:0008285	negative_regulation_of_cell_proliferation	Biological Process	2	376	16	23833	0.0257428	0.0408361	1.58934	7.9232	0.125	Rarg//Sfrp5
GO:0008152	metabolic_process	Biological Process	2	438	16	23833	0.0341136	0.047682	1.46707	6.80166	0.125	Aacs//Slc27a1
GO:0008284	positive_regulation_of_cell_proliferation	Biological Process	2	474	16	23833	0.0394041	0.0528672	1.40446	6.28507	0.125	Klb//Rarg
GO:0043066	negative_regulation_of_apoptotic_process	Biological Process	2	500	16	23833	0.0434102	0.0572873	1.36241	5.95825	0.125	Pim3//Rarg
GO:0007049	cell_cycle	Biological Process	2	604	16	23833	0.0608665	0.0725889	1.21562	4.93233	0.125	Mapre2//Pim3
GO:0016021	integral_component_of_membrane	Cellular Component	10	5379	17	23653	0.00143427	0.0475291	2.84337	2.58664	0.588235	Adig//Chst1//Klb//Mgst3//Rprml//Sfrp5//Slc1a5//Slc27a1//Slc2a4//Tspo
GO:0043231	intracellular_membrane-bounded_organelle	Cellular Component	4	789	17	23653	0.00206648	0.0475291	2.68477	7.05375	0.235294	Ahcyl2//Mgst3//Slc27a1//Slc2a4
GO:0016020	membrane	Cellular Component	9	6959	17	23653	0.0356425	0.144694	1.44803	1.79942	0.529412	Adig//Chst1//Klb//Mgst3//Rprml//Slc1a5//Slc27a1//Slc2a4//Tspo
GO:0005737	cytoplasm	Cellular Component	8	6176	17	23653	0.0509796	0.151155	1.2926	1.80227	0.470588	Aacs//Adig//Ahcyl2//Fam89b//Mapre2//Pim3//Slc27a1//Slc2a4
GO:0005783	endoplasmic_reticulum	Cellular Component	3	1355	17	23653	0.0699445	0.178747	1.15525	3.08049	0.176471	Ahcyl2//Mgst3//Slc27a1
GO:0016874	ligase_activity	Molecular Function	2	148	18	23122	0.00582148	0.0232859	2.23497	17.3589	0.111111	Aacs//Slc27a1
GO:0003824	catalytic_activity	Molecular Function	2	472	18	23122	0.0512895	0.0831722	1.28997	5.44303	0.111111	Aacs//Slc27a1

## Sheet: down
Column "ID" stands for the ID of gene ontology term
Column "Term" stands for the name of gene ontology term
Column "Ontology" stands for the class of ontology
Column "Count" stands for the number of DE genes associated with the term
Column "Size" stands for the number of background population genes associated with the term
Column "numInt" stands for the total number of DE genes
Column "numTotal" stands for the total number of background population genes
Column "p_value" stands for the fisher exact test value of the term
Column "fdr" stands for the false discovery rate of the term, using Benjamini & Hochberg (1995) method
Column "Enrichment_Score" stands for the Enrichment Score value of the term, it equals (-log10(Pvalue))
Column "Fold_Enrichment" stands for the Fold Enrichment value of the term, it equals (Count/Size)/(numInt/numTotal)
Column "GeneRatio" stands for the Gene Ratio value genes associated with the term, it equals (Count/numInt)
Column "Genes" stands for the DE genes associated with the term
ID	Term	Ontology	Count	Size	numInt	numTotal	p_value	fdr	Enrichment_Score	Fold_Enrichment	GeneRatio	Genes
GO:0002376	immune_system_process	Biological Process	14	384	91	23833	2.18007e-10	1.1162e-07	9.66153	9.54848	0.153846	Adgre1//Btk//C1rb//Cadm1//Cd180//Cd300ld3//Cd86//Fcgr1//Ly86//March1//S100a8//S100a9//Tlr1//Tlr8
GO:0006954	inflammatory_response	Biological Process	12	320	91	23833	3.41844e-09	8.75121e-07	8.46617	9.82129	0.131868	Ccl12//Ccl3//Ccl7//Cd180//Cxcl1//Cybb//Il18//Ly86//S100a8//S100a9//Tlr1//Tlr8
GO:0030593	neutrophil_chemotaxis	Biological Process	6	62	91	23833	1.35721e-07	2.31631e-05	6.86735	25.3453	0.0659341	Ccl12//Ccl3//Ccl7//Cxcl1//S100a8//S100a9
GO:0006935	chemotaxis	Biological Process	7	119	91	23833	3.70574e-07	4.74334e-05	6.43113	15.4059	0.0769231	Ccl12//Ccl3//Ccl7//Cxcl1//Cxcl16//S100a8//S100a9
GO:0002224	toll-like_receptor_signaling_pathway	Biological Process	4	19	91	23833	7.3772e-07	7.55425e-05	6.13211	55.1371	0.043956	Cd180//Cd86//Tlr1//Tlr8
GO:0048247	lymphocyte_chemotaxis	Biological Process	4	26	91	23833	2.78786e-06	0.000237897	5.55473	40.2925	0.043956	Ccl12//Ccl3//Ccl7//Cxcl16
GO:0070488	neutrophil_aggregation	Biological Process	2	2	91	23833	1.44193e-05	0.00105467	4.84106	261.901	0.021978	S100a8//S100a9
GO:0045087	innate_immune_response	Biological Process	10	501	91	23833	2.15958e-05	0.00138213	4.66563	5.22757	0.10989	Btk//C1rb//Cd180//Cybb//Fcgr1//Ly86//S100a8//S100a9//Tlr1//Tlr8
GO:0070098	chemokine-mediated_signaling_pathway	Biological Process	4	47	91	23833	3.12851e-05	0.00177977	4.50466	22.2895	0.043956	Ccl12//Ccl3//Ccl7//Cxcl1
GO:0001774	microglial_cell_activation	Biological Process	3	18	91	23833	4.21536e-05	0.00196206	4.37517	43.6502	0.032967	Aif1//Tlr1//Tlr8
GO:0008053	mitochondrial_fusion	Biological Process	3	18	91	23833	4.21536e-05	0.00196206	4.37517	43.6502	0.032967	Bcl2a1a//Bcl2a1b//Bcl2a1d
GO:0071347	cellular_response_to_interleukin-1	Biological Process	4	53	91	23833	5.04713e-05	0.00215344	4.29696	19.7661	0.043956	Ccl12//Ccl3//Ccl7//Saa3
GO:0032148	activation_of_protein_kinase_B_activity	Biological Process	3	20	91	23833	5.8566e-05	0.0023066	4.23235	39.2852	0.032967	Fgf1//Il18//Osbpl8
GO:0001805	positive_regulation_of_type_III_hypersensitivity	Biological Process	2	4	91	23833	8.60857e-05	0.00293839	4.06507	130.951	0.021978	Btk//Fcgr1
GO:0002793	positive_regulation_of_peptide_secretion	Biological Process	2	4	91	23833	8.60857e-05	0.00293839	4.06507	130.951	0.021978	S100a8//S100a9
GO:0001836	release_of_cytochrome_c_from_mitochondria	Biological Process	3	26	91	23833	0.000131374	0.00407094	3.88149	30.2194	0.032967	Bcl2a1a//Bcl2a1b//Bcl2a1d
GO:0002322	B_cell_proliferation_involved_in_immune_response	Biological Process	2	5	91	23833	0.000143119	0.00407094	3.8443	104.76	0.021978	Cd180//Plcl2
GO:0018119	peptidyl-cysteine_S-nitrosylation	Biological Process	2	5	91	23833	0.000143119	0.00407094	3.8443	104.76	0.021978	S100a8//S100a9
GO:0050776	regulation_of_immune_response	Biological Process	3	30	91	23833	0.00020289	0.00546156	3.69274	26.1901	0.032967	Card11//Clec12a//Fcgr1
GO:0043615	astrocyte_cell_migration	Biological Process	2	6	91	23833	0.000214145	0.00546156	3.66929	87.3004	0.021978	Ccl12//Ccl3
GO:0002548	monocyte_chemotaxis	Biological Process	3	31	91	23833	0.000224009	0.00546156	3.64973	25.3453	0.032967	Ccl12//Ccl3//Ccl7
GO:0031666	positive_regulation_of_lipopolysaccharide-mediated_signaling_pathway	Biological Process	2	8	91	23833	0.000397751	0.00925675	3.40039	65.4753	0.021978	Cd180//Ly86
GO:0097192	extrinsic_apoptotic_signaling_pathway_in_absence_of_ligand	Biological Process	3	39	91	23833	0.000445498	0.00991717	3.35115	20.1462	0.032967	Bcl2a1a//Bcl2a1b//Bcl2a1d
GO:0050707	regulation_of_cytokine_secretion	Biological Process	2	10	91	23833	0.00063607	0.0134327	3.1965	52.3802	0.021978	Tlr1//Tlr8
GO:0071222	cellular_response_to_lipopolysaccharide	Biological Process	5	181	91	23833	0.000655894	0.0134327	3.18317	7.23484	0.0549451	Cd180//Cd86//Cxcl16//Fcgr4//Stap1
GO:0010744	positive_regulation_of_macrophage_derived_foam_cell_differentiation	Biological Process	2	11	91	23833	0.000775487	0.0147055	3.11043	47.6184	0.021978	Il18//Msr1
GO:0060100	positive_regulation_of_phagocytosis_engulfment	Biological Process	2	11	91	23833	0.000775487	0.0147055	3.11043	47.6184	0.021978	Fcgr1//Stap1
GO:0031532	actin_cytoskeleton_reorganization	Biological Process	3	50	91	23833	0.00092691	0.0160084	3.03296	15.7141	0.032967	Gpr65//Plek//S100a9
GO:0006898	receptor-mediated_endocytosis	Biological Process	3	51	91	23833	0.000982134	0.0160084	3.00783	15.4059	0.032967	Cxcl16//Fcgr1//Msr1
GO:0050729	positive_regulation_of_inflammatory_response	Biological Process	3	51	91	23833	0.000982134	0.0160084	3.00783	15.4059	0.032967	Ccl3//S100a8//S100a9
GO:0006952	defense_response	Biological Process	4	116	91	23833	0.00102782	0.0160084	2.98808	9.03107	0.043956	Cd83//Cxcl1//Gm5431//Tlr1
GO:0002523	leukocyte_migration_involved_in_inflammatory_response	Biological Process	2	13	91	23833	0.00109433	0.0160084	2.96085	40.2925	0.021978	S100a8//S100a9
GO:0032930	positive_regulation_of_superoxide_anion_generation	Biological Process	2	13	91	23833	0.00109433	0.0160084	2.96085	40.2925	0.021978	Cxcl1//Il18
GO:0042535	positive_regulation_of_tumor_necrosis_factor_biosynthetic_process	Biological Process	2	13	91	23833	0.00109433	0.0160084	2.96085	40.2925	0.021978	Cybb//Tlr1
GO:0045744	negative_regulation_of_G-protein_coupled_receptor_protein_signaling_pathway	Biological Process	2	13	91	23833	0.00109433	0.0160084	2.96085	40.2925	0.021978	Plek//Rgs2
GO:0006955	immune_response	Biological Process	6	307	91	23833	0.00115911	0.0160542	2.93588	5.11859	0.0659341	Ccl12//Ccl3//Ccl7//Cxcl1//Il18//March1
GO:0071346	cellular_response_to_interferon-gamma	Biological Process	3	54	91	23833	0.00116017	0.0160542	2.93548	14.5501	0.032967	Ccl12//Ccl3//Ccl7
GO:0048246	macrophage_chemotaxis	Biological Process	2	14	91	23833	0.00127355	0.0169281	2.89499	37.4144	0.021978	Ccl12//Ccl3
GO:0008630	intrinsic_apoptotic_signaling_pathway_in_response_to_DNA_damage	Biological Process	3	56	91	23833	0.00128945	0.0169281	2.8896	14.0304	0.032967	Bcl2a1a//Bcl2a1b//Bcl2a1d
GO:0006915	apoptotic_process	Biological Process	8	559	91	23833	0.00134568	0.0172247	2.87106	3.74814	0.0879121	Bcl2a1a//Btk//Cadm1//Comp//Gpr65//S100a8//S100a9//Srgn
GO:0001775	cell_activation	Biological Process	2	15	91	23833	0.00146583	0.0178692	2.83392	34.9201	0.021978	Timp1//Tlr1
GO:0002755	MyD88-dependent_toll-like_receptor_signaling_pathway	Biological Process	2	15	91	23833	0.00146583	0.0178692	2.83392	34.9201	0.021978	Tlr1//Tlr8
GO:0030595	leukocyte_chemotaxis	Biological Process	2	16	91	23833	0.00167108	0.0198975	2.777	32.7376	0.021978	Ccl3//S100a9
GO:0042102	positive_regulation_of_T_cell_proliferation	Biological Process	3	63	91	23833	0.00181202	0.0210275	2.74184	12.4715	0.032967	Aif1//Card11//Cd86
GO:0014002	astrocyte_development	Biological Process	2	17	91	23833	0.00188919	0.0210275	2.72372	30.8119	0.021978	S100a8//S100a9
GO:0050732	negative_regulation_of_peptidyl-tyrosine_phosphorylation	Biological Process	2	17	91	23833	0.00188919	0.0210275	2.72372	30.8119	0.021978	Errfi1//Il18
GO:0043547	positive_regulation_of_GTPase_activity	Biological Process	4	146	91	23833	0.00239077	0.0260441	2.62146	7.17537	0.043956	Ccl12//Ccl3//Ccl7//Rgs2
GO:0032722	positive_regulation_of_chemokine_production	Biological Process	2	20	91	23833	0.00261974	0.0271519	2.58174	26.1901	0.021978	Adam17//Il18
GO:0050718	positive_regulation_of_interleukin-1_beta_secretion	Biological Process	2	21	91	23833	0.00288833	0.0271519	2.53935	24.943	0.021978	Ccl3//Tlr8
GO:0071356	cellular_response_to_tumor_necrosis_factor	Biological Process	3	76	91	23833	0.00309536	0.0271519	2.50929	10.3382	0.032967	Ccl12//Ccl3//Ccl7
GO:0042104	positive_regulation_of_activated_T_cell_proliferation	Biological Process	2	25	91	23833	0.00408548	0.0286543	2.38876	20.9521	0.021978	Cd86//Il18
GO:0031663	lipopolysaccharide-mediated_signaling_pathway	Biological Process	2	29	91	23833	0.00547453	0.0378778	2.26165	18.0621	0.021978	Ccl12//Il18
GO:2001244	positive_regulation_of_intrinsic_apoptotic_signaling_pathway	Biological Process	2	30	91	23833	0.00585108	0.0390249	2.23276	17.4601	0.021978	S100a8//S100a9
GO:0030335	positive_regulation_of_cell_migration	Biological Process	4	190	91	23833	0.00609971	0.0390249	2.21469	5.51371	0.043956	Adam17//Aif1//Cxcl16//Fgf1
GO:0008277	regulation_of_G-protein_coupled_receptor_protein_signaling_pathway	Biological Process	2	31	91	23833	0.00623915	0.0390249	2.20487	16.8968	0.021978	Rgs18//Rgs2
GO:0007156	homophilic_cell_adhesion_via_plasma_membrane_adhesion_molecules	Biological Process	3	99	91	23833	0.00648487	0.0390249	2.1881	7.9364	0.032967	Cadm1//Cdh11//Fat3
GO:0043065	positive_regulation_of_apoptotic_process	Biological Process	5	322	91	23833	0.00788121	0.0396795	2.10341	4.06679	0.0549451	Bcl2a1a//Bcl2a1b//Bcl2a1d//Fosl1//Il18
GO:0042110	T_cell_activation	Biological Process	2	35	91	23833	0.0079049	0.0396795	2.1021	14.9658	0.021978	Card11//Cd48
GO:0007249	I-kappaB_kinase/NF-kappaB_signaling	Biological Process	2	36	91	23833	0.00834925	0.0415031	2.07835	14.5501	0.021978	Btk//Tlr8
GO:0043066	negative_regulation_of_apoptotic_process	Biological Process	6	500	91	23833	0.0123174	0.0512726	1.90948	3.14281	0.0659341	Adam17//Aif1//Bcl2a1a//Comp//Serpinb2//Timp1
GO:0006417	regulation_of_translation	Biological Process	3	126	91	23833	0.012503	0.0516253	1.90299	6.23574	0.032967	Igf2bp2//Rgs2//S100a9
GO:0008360	regulation_of_cell_shape	Biological Process	3	133	91	23833	0.014446	0.0547575	1.84025	5.90754	0.032967	Ccl12//Ccl3//Fgd4
GO:0002250	adaptive_immune_response	Biological Process	3	139	91	23833	0.0162403	0.0581471	1.78941	5.65254	0.032967	Adgre1//Btk//Cd86
GO:0071407	cellular_response_to_organic_cyclic_compound	Biological Process	2	54	91	23833	0.0181424	0.0625879	1.7413	9.70004	0.021978	Ccl12//Il18
GO:0009968	negative_regulation_of_signal_transduction	Biological Process	2	56	91	23833	0.0194287	0.063766	1.71156	9.35361	0.021978	Rgs18//Rgs2
GO:0032760	positive_regulation_of_tumor_necrosis_factor_production	Biological Process	2	57	91	23833	0.0200858	0.0655029	1.69711	9.18951	0.021978	Ccl3//Il18
GO:0007165	signal_transduction	Biological Process	10	1245	91	23833	0.0202794	0.0657154	1.69295	2.10362	0.10989	Adgre1//Arhgap19//Card11//Cd48//Cd83//Gpr34//Gpr65//Plcl2//Tlr1//Tlr8
GO:0010033	response_to_organic_substance	Biological Process	2	59	91	23833	0.0214277	0.0667783	1.66902	8.878	0.021978	Btk//Gatm
GO:0050727	regulation_of_inflammatory_response	Biological Process	2	60	91	23833	0.0221123	0.0667783	1.65537	8.73004	0.021978	S100a8//S100a9
GO:0034097	response_to_cytokine	Biological Process	2	63	91	23833	0.0242198	0.0683358	1.61583	8.31432	0.021978	Cxcl16//Timp1
GO:0006919	activation_of_cysteine-type_endopeptidase_activity_involved_in_apoptotic_process	Biological Process	2	66	91	23833	0.0264062	0.0683358	1.57829	7.9364	0.021978	S100a8//S100a9
GO:0000165	MAPK_cascade	Biological Process	2	70	91	23833	0.0294406	0.0719657	1.53105	7.48289	0.021978	Ccl12//Il18
GO:0043525	positive_regulation_of_neuron_apoptotic_process	Biological Process	2	71	91	23833	0.03022	0.0719657	1.51971	7.3775	0.021978	Ccl3//Il18
GO:0007166	cell_surface_receptor_signaling_pathway	Biological Process	3	179	91	23833	0.0312801	0.0741453	1.50473	4.3894	0.032967	Adgre1//Cd53//Fcgr1
GO:0070374	positive_regulation_of_ERK1_and_ERK2_cascade	Biological Process	3	187	91	23833	0.0349298	0.0787435	1.4568	4.20162	0.032967	Ccl12//Ccl3//Ccl7
GO:0048661	positive_regulation_of_smooth_muscle_cell_proliferation	Biological Process	2	77	91	23833	0.0350655	0.0787435	1.45512	6.80263	0.021978	Aif1//Il18
GO:0001934	positive_regulation_of_protein_phosphorylation	Biological Process	3	191	91	23833	0.036834	0.080874	1.43375	4.11363	0.032967	Adam17//Aif1//Fgf1
GO:0030183	B_cell_differentiation	Biological Process	2	80	91	23833	0.0375938	0.080874	1.42488	6.54753	0.021978	Adam17//Card11
GO:0051897	positive_regulation_of_protein_kinase_B_signaling	Biological Process	2	85	91	23833	0.0419574	0.0855865	1.37719	6.16238	0.021978	Il18//Osbpl8
GO:0030307	positive_regulation_of_cell_growth	Biological Process	2	91	91	23833	0.0474307	0.0913461	1.32394	5.75607	0.021978	Adam17//Cxcl16
GO:0007155	cell_adhesion	Biological Process	5	526	91	23833	0.0510489	0.09574	1.29201	2.48955	0.0549451	Adam17//Cadm1//Cdh11//Comp//Fat3
GO:0001525	angiogenesis	Biological Process	3	225	91	23833	0.0551033	0.101281	1.25882	3.49201	0.032967	Ccl12//Fgf1//Il18
GO:0007169	transmembrane_receptor_protein_tyrosine_kinase_signaling_pathway	Biological Process	2	100	91	23833	0.0560957	0.101488	1.25107	5.23802	0.021978	Btk//Stap1
GO:0051092	positive_regulation_of_NF-kappaB_transcription_factor_activity	Biological Process	2	111	91	23833	0.0673687	0.114214	1.17154	4.71894	0.021978	Card11//Rab7b
GO:0001666	response_to_hypoxia	Biological Process	2	113	91	23833	0.0694933	0.116583	1.15806	4.63542	0.021978	Adam17//Il18
GO:0010466	negative_regulation_of_peptidase_activity	Biological Process	2	116	91	23833	0.0727211	0.12015	1.13834	4.51554	0.021978	Serpinb2//Timp1
GO:0045766	positive_regulation_of_angiogenesis	Biological Process	2	123	91	23833	0.0804359	0.126052	1.09455	4.25855	0.021978	Cybb//Fgf1
GO:0032496	response_to_lipopolysaccharide	Biological Process	2	135	91	23833	0.0942137	0.141397	1.02589	3.88002	0.021978	Adam17//Cxcl1
GO:0051607	defense_response_to_virus	Biological Process	2	138	91	23833	0.0977586	0.144456	1.00985	3.79567	0.021978	Cd86//Tlr8
GO:0005576	extracellular_region	Cellular Component	20	1654	93	23653	5.3143e-06	0.000437217	5.27455	3.07537	0.215054	Adam17//Ccl12//Ccl3//Ccl7//Comp//Cpxm1//Cxcl1//Fgf1//Fgl2//Glipr1//Il18//Ltbp4//Lum//Ly86//S100a8//S100a9//Saa3//Serpinb2//Srgn//Timp1
GO:0005886	plasma_membrane	Cellular Component	32	3753	93	23653	8.65428e-06	0.000437217	5.06277	2.16858	0.344086	Adam17//Adgre1//Aif1//Anxa8//Btk//Cadm1//Card11//Cd180//Cd200r1//Cd300ld3//Cd48//Cd53//Cd86//Cdh11//Clec12a//Cybb//Errfi1//Fat3//Fcgr1//Fcgr4//Folr2//Gpr34//Gpr65//Lair1//March1//Msr1//Ptchd1//Rgs18//Rgs2//S100a8//S100a9//Tlr1
GO:0005615	extracellular_space	Cellular Component	19	1598	93	23653	1.21449e-05	0.000437217	4.91561	3.02399	0.204301	Adam17//C1rb//Ccl12//Ccl3//Ccl7//Comp//Cpxm1//Cxcl1//Cxcl16//Fgf1//Frmd4b//Il18//Ltbp4//Lum//S100a8//S100a9//Saa3//Serpinb2//Timp1
GO:0009897	external_side_of_plasma_membrane	Cellular Component	8	417	93	23653	0.00024059	0.00649594	3.61872	4.8793	0.0860215	Adgre1//Cd200r1//Cd48//Cd83//Cd86//Fcgr1//Fcgr4//Tlr8
GO:0070062	extracellular_exosome	Cellular Component	22	2595	93	23653	0.000373546	0.00786632	3.42766	2.1562	0.236559	Anxa8//Atp6v0d2//C1rb//Cadm1//Card11//Cd48//Cd53//Cd86//Cdh11//Comp//Fcgr4//Fgl2//Gatm//Il18//Lair1//Lilra5//Ltbp4//Lum//Myo1e//S100a8//S100a9//Timp1
GO:0016020	membrane	Cellular Component	43	6959	93	23653	0.000437018	0.00786632	3.3595	1.57154	0.462366	Adam17//Adgre1//Aif1//Atp6v0d2//Btk//Cadm1//Card11//Ccdc115//Cd180//Cd200r1//Cd300ld3//Cd48//Cd53//Cd72//Cd83//Cd86//Cdh11//Clec12a//Cxcl16//Cybb//Errfi1//Fat3//Fcgr1//Fcgr4//Folr2//Gatm//Glipr1//Gpr34//Gpr65//Lair1//March1//Msr1//Nceh1//Osbpl8//Plek//Ptchd1//Rab7b//Rgs2//S100a8//S100a9//Tlr1//Tlr8//Tmem252
GO:0045335	phagocytic_vesicle	Cellular Component	3	41	93	23653	0.000562905	0.00818745	3.24956	18.6098	0.0322581	Cybb//Rab7b//Tlr1
GO:0045121	membrane_raft	Cellular Component	6	263	93	23653	0.000606477	0.00818745	3.21719	5.80228	0.0645161	Adam17//Btk//Card11//Cd48//Fcgr1//Tlr1
GO:0032587	ruffle_membrane	Cellular Component	3	62	93	23653	0.00188163	0.0225795	2.72547	12.3065	0.0322581	Adam17//Aif1//Plek
GO:0031012	extracellular_matrix	Cellular Component	5	274	93	23653	0.00456424	0.0492938	2.34063	4.64112	0.0537634	Comp//Ltbp4//Lum//S100a9//Timp1
GO:0031902	late_endosome_membrane	Cellular Component	2	27	93	23653	0.00503542	0.0494387	2.29796	18.8395	0.0215054	Anxa8//March1
GO:0005911	cell-cell_junction	Cellular Component	4	185	93	23653	0.00615842	0.0554258	2.21053	5.4991	0.0430108	Adam17//Cadm1//Cd53//Myo1e
GO:0005578	proteinaceous_extracellular_matrix	Cellular Component	5	310	93	23653	0.0076139	0.0602184	2.11839	4.10215	0.0537634	Comp//Fgf1//Ltbp4//Lum//Timp1
GO:0001772	immunological_synapse	Cellular Component	2	35	93	23653	0.00836366	0.0602184	2.0776	14.5333	0.0215054	Card11//Cd53
GO:0005887	integral_component_of_plasma_membrane	Cellular Component	10	1073	93	23653	0.00948345	0.0640133	2.02303	2.3703	0.107527	Adam17//Cadm1//Cd180//Cd53//Cd72//Cybb//Gpr34//Gpr65//Tlr1//Tlr8
GO:0031410	cytoplasmic_vesicle	Cellular Component	7	679	93	23653	0.0176188	0.105713	1.75402	2.62199	0.0752688	Btk//Ccdc115//March1//Msr1//Myo1e//Rab7b//Tlr1
GO:0005741	mitochondrial_outer_membrane	Cellular Component	3	148	93	23653	0.0206839	0.111693	1.68437	5.15541	0.0322581	Bcl2a1a//Bcl2a1b//Bcl2a1d
GO:0031234	extrinsic_component_of_cytoplasmic_side_of_plasma_membrane	Cellular Component	2	75	93	23653	0.0352548	0.137438	1.45278	6.78222	0.0215054	Btk//Errfi1
GO:0009986	cell_surface	Cellular Component	6	624	93	23653	0.0365171	0.137438	1.4375	2.44551	0.0645161	Adam17//Cd53//Cd86//Clec12a//Fcgr4//Folr2
GO:0016021	integral_component_of_membrane	Cellular Component	29	5379	93	23653	0.0376192	0.137438	1.42459	1.3712	0.311828	Adam17//Adgre1//Cadm1//Cd180//Cd200r1//Cd300ld3//Cd53//Cd72//Cd83//Cd86//Cdh11//Clec12a//Cxcl16//Cybb//Fat3//Fcgr1//Fcgr4//Glipr1//Gpr34//Gpr65//Lair1//March1//Msr1//Nceh1//Osbpl8//Ptchd1//Tlr1//Tlr8//Tmem252
GO:0001726	ruffle	Cellular Component	2	79	93	23653	0.0387511	0.137438	1.41172	6.43882	0.0215054	Aif1//Frmd4b
GO:0005764	lysosome	Cellular Component	4	335	93	23653	0.0432676	0.137438	1.36384	3.03682	0.0430108	Ccdc115//Cd300ld3//March1//Rab7b
GO:0005768	endosome	Cellular Component	5	568	93	23653	0.0733665	0.184269	1.1345	2.23885	0.0537634	Atp6v0d2//Ccdc115//Cd300ld3//March1//Rab7b
GO:0005856	cytoskeleton	Cellular Component	8	1139	93	23653	0.0793421	0.186497	1.1005	1.78636	0.0860215	Aif1//Fgd4//Frmd4b//Gas2l3//Igf2bp2//Myo1e//S100a8//S100a9
GO:0008009	chemokine_activity	Molecular Function	5	40	87	23122	3.98222e-07	4.19624e-05	6.39988	33.2213	0.0574713	Ccl12//Ccl3//Ccl7//Cxcl1//Cxcl16
GO:0035662	Toll-like_receptor_4_binding	Molecular Function	3	5	87	23122	5.11737e-07	4.19624e-05	6.29095	159.462	0.0344828	S100a8//S100a9//Saa3
GO:0051400	BH_domain_binding	Molecular Function	3	11	87	23122	8.30663e-06	0.000454096	5.08058	72.4828	0.0344828	Bcl2a1a//Bcl2a1b//Bcl2a1d
GO:0005509	calcium_ion_binding	Molecular Function	11	586	87	23122	1.23693e-05	0.000463372	4.90765	4.98886	0.126437	Adgre1//Aif1//Anxa8//C1rb//Cdh11//Comp//Fat3//Hpgds//Ltbp4//S100a8//S100a9
GO:0005125	cytokine_activity	Molecular Function	7	209	87	23122	1.41272e-05	0.000463372	4.84994	8.90139	0.0804598	Ccl12//Ccl3//Ccl7//Cxcl1//Cxcl16//Il18//Timp1
GO:0015267	channel_activity	Molecular Function	3	15	87	23122	2.26579e-05	0.000619315	4.64478	53.154	0.0344828	Bcl2a1a//Bcl2a1b//Bcl2a1d
GO:0019770	IgG_receptor_activity	Molecular Function	2	4	87	23122	8.35614e-05	0.00171301	4.07799	132.885	0.0229885	Fcgr1//Fcgr4
GO:0031727	CCR2_chemokine_receptor_binding	Molecular Function	2	4	87	23122	8.35614e-05	0.00171301	4.07799	132.885	0.0229885	Ccl12//Ccl7
GO:0019864	IgG_binding	Molecular Function	2	8	87	23122	0.000386148	0.00575711	3.41325	66.4425	0.0229885	Fcgr1//Fcgr4
GO:0050544	arachidonic_acid_binding	Molecular Function	2	8	87	23122	0.000386148	0.00575711	3.41325	66.4425	0.0229885	S100a8//S100a9
GO:0050786	RAGE_receptor_binding	Molecular Function	2	8	87	23122	0.000386148	0.00575711	3.41325	66.4425	0.0229885	S100a8//S100a9
GO:0004872	receptor_activity	Molecular Function	5	174	87	23122	0.000511567	0.00699142	3.2911	7.63707	0.0574713	Cadm1//Cd180//Cd200r1//Cd48//Tlr8
GO:0005518	collagen_binding	Molecular Function	3	59	87	23122	0.00143658	0.018123	2.84267	13.5137	0.0344828	Comp//Lum//Srgn
GO:0051015	actin_filament_binding	Molecular Function	4	151	87	23122	0.00255618	0.0299438	2.59241	7.04027	0.045977	Aif1//Anxa8//Fgd4//Myo1e
GO:0043325	phosphatidylinositol-3,4-bisphosphate_binding	Molecular Function	2	22	87	23122	0.0030785	0.0336582	2.51166	24.1609	0.0229885	Anxa8//Plek
GO:0016209	antioxidant_activity	Molecular Function	2	25	87	23122	0.00396889	0.0342578	2.40133	21.2616	0.0229885	S100a8//S100a9
GO:0005547	phosphatidylinositol-3,4,5-trisphosphate_binding	Molecular Function	2	38	87	23122	0.00901073	0.0703695	2.04524	13.9879	0.0229885	Anxa8//Btk
GO:0005044	scavenger_receptor_activity	Molecular Function	2	43	87	23122	0.0114346	0.0721258	1.94178	12.3614	0.0229885	Cxcl16//Msr1
GO:0005096	GTPase_activator_activity	Molecular Function	4	235	87	23122	0.0119983	0.0728784	1.92088	4.52375	0.045977	Arhgap19//Rasgrp3//Rgs18//Rgs2
GO:0008201	heparin_binding	Molecular Function	3	144	87	23122	0.017138	0.0923345	1.76604	5.53688	0.0344828	Ccl7//Comp//Fgf1
GO:0008083	growth_factor_activity	Molecular Function	3	145	87	23122	0.0174535	0.0923345	1.75812	5.49869	0.0344828	Cxcl1//Fgf1//Timp1
GO:0003779	actin_binding	Molecular Function	4	341	87	23122	0.0398671	0.134356	1.39939	3.11754	0.045977	Aif1//Fgd4//Gas2l3//Myo1e
GO:0008017	microtubule_binding	Molecular Function	3	203	87	23122	0.0413046	0.134356	1.384	3.92764	0.0344828	Gas2l3//S100a8//S100a9
GO:0008233	peptidase_activity	Molecular Function	5	512	87	23122	0.0440036	0.134356	1.35651	2.59541	0.0574713	Adam17//C1rb//Cpxm1//Fgl2//Mcpt4
GO:0019900	kinase_binding	Molecular Function	2	99	87	23122	0.0536827	0.149706	1.27017	5.36909	0.0229885	Errfi1//Rasgrp3
GO:0046982	protein_heterodimerization_activity	Molecular Function	5	548	87	23122	0.0558385	0.149706	1.25307	2.42491	0.0574713	Bcl2a1a//Bcl2a1b//Bcl2a1d//Cybb//Tlr1
GO:0005178	integrin_binding	Molecular Function	2	102	87	23122	0.0565961	0.149706	1.24721	5.21118	0.0229885	Adam17//Fgf1
GO:0008144	drug_binding	Molecular Function	2	108	87	23122	0.0625842	0.160372	1.20354	4.92167	0.0229885	Folr2//Tlr8
GO:0030165	PDZ_domain_binding	Molecular Function	2	116	87	23122	0.0708848	0.16419	1.14945	4.58224	0.0229885	Adam17//Cadm1
GO:0030414	peptidase_inhibitor_activity	Molecular Function	2	118	87	23122	0.0730136	0.16419	1.1366	4.50458	0.0229885	Serpinb2//Timp1
GO:0008289	lipid_binding	Molecular Function	3	258	87	23122	0.0736196	0.16419	1.13301	3.09035	0.0344828	Btk//Myo1e//Osbpl8
GO:0004867	serine-type_endopeptidase_inhibitor_activity	Molecular Function	2	119	87	23122	0.0740857	0.16419	1.13027	4.46672	0.0229885	Serpinb2//Wfdc17
GO:0002020	protease_binding	Molecular Function	2	122	87	23122	0.0773323	0.166875	1.11164	4.35689	0.0229885	Comp//Timp1
GO:0017124	SH3_domain_binding	Molecular Function	2	123	87	23122	0.0784245	0.167034	1.10555	4.32147	0.0229885	Adam17//Errfi1
GO:0042803	protein_homodimerization_activity	Molecular Function	6	832	87	23122	0.0934853	0.184718	1.02926	1.91661	0.0689655	Bcl2a1a//Bcl2a1b//Bcl2a1d//Cadm1//Hpgds//Plek
